# Supplementary material for: International Core Outcome Set for Acute Simple Appendicitis in Children: Results of a Systematic Review, Delphi Study, and Focus Croups With Young People
Source: PubMed Central journal article supplement — Ann Surg. 2020 Dec 29;276(6):1047–55. doi: 10.1097/SLA.0000000000004707 (PMC9645539; doi:10.1097/sla.0000000000004707), 2020-12-29
Supplement: sla-276-01047-s008.pdf [file sla-276-01047-s008.pdf]

**S8. Supplemental document 4. Percentage of parents and surgeons scoring outcome terms in the Delphi Survey as critical (score 7-9) per country**

  = Outcome terms that met threshold for “consensus-in” (70% within group voting outcome as critical)

R1 = number of respondents per country in round 1

R2 = number of respondents per country in round 2

*Weighted Average = Percentage from all countries divided by the number of countries*

*Total average = Average of all respondents scores. Non weighting per country*

*N/A = Not applicable, because outcome term added after round 1*

**Bowel obstructions**

|         | Australia<br>R1= 23<br>R2= 17 | Canada<br>R1= 19<br>R2= 7 | Finland<br>R1 = 13<br>R2 = 13 | Malaysia<br>R1= 10<br>R2= 6 | Netherlands<br>R1= 20<br>R2= 17 | Singapore<br>R1 = 32<br>R2 = 13 | Sweden<br>R1 = 10<br>R2 = 8 | USA<br>R1= 15<br>R2= 10 | Weighted<br>Average | Total<br>average |        |
|---------|-------------------------------|---------------------------|-------------------------------|-----------------------------|---------------------------------|---------------------------------|-----------------------------|-------------------------|---------------------|------------------|--------|
| Parents |                               |                           |                               |                             |                                 |                                 |                             |                         |                     |                  |        |
| Round 1 | 86,40%                        | 66,70%                    | 69,20%                        |                             | 75,00%                          | 100,00%                         | 59,40%                      | 84,60%                  | 88,20%              | 77,10%           | 78,69% |
| Round 2 | 94,12%                        | 85,71%                    | 69,23%                        |                             | 100,00%                         | 94,12%                          | 76,92%                      | 100,00%                 | 80,00%              | 87,51%           | 86,80% |

|          | Australia<br>R1 = 18<br>R2 = 14 | Canada<br>R1 = 19<br>R2 = 17 | UK<br>R1 = 26<br>R2 = 20 | Finland<br>R1 = 19<br>R2 = 19 | France<br>R1 = 23<br>R2 = 18 | Malaysia<br>R1 = 34<br>R2= 34 | Netherlands<br>R1 = 24<br>R2 = 21 | Singapore<br>R1 = 32<br>R2 = 20 | Sweden<br>R1 = 19<br>R2 = 19 | USA<br>R1= 31<br>R2= 27 | Weighted<br>Average | Total<br>average |
|----------|---------------------------------|------------------------------|--------------------------|-------------------------------|------------------------------|-------------------------------|-----------------------------------|---------------------------------|------------------------------|-------------------------|---------------------|------------------|
| Surgeons |                                 |                              |                          |                               |                              |                               |                                   |                                 |                              |                         |                     |                  |
| Round 1  | 72,22%                          | 63,16%                       | 73,08%                   | 84,21%                        | 65,22%                       | 67,65%                        | 58,33%                            | 59,38%                          | 68,42%                       | 61,29%                  | 67,30%              | 66,53%           |
| Round 2  | 78,6%                           | 70,60%                       | 90,00%                   | 94,40%                        | 88,90%                       | 88,20%                        | 76,20%                            | 80,00%                          | 73,70%                       | 81,50%                  | 74,35%              | 82,70%           |

**Analgesia doses**

|         | Australia<br>R1= 23<br>R2= 17 | Canada<br>R1= 19<br>R2= 7 | Finland<br>R1 = 13<br>R2 = 13 | Malaysia<br>R1= 10<br>R2= 6 | Netherlands<br>R1= 20<br>R2= 17 | Singapore<br>R1 = 32<br>R2 = 13 | Sweden<br>R1 = 10<br>R2 = 8 | USA<br>R1= 15<br>R2= 10 | Weighted<br>Average | Total<br>average |
|---------|-------------------------------|---------------------------|-------------------------------|-----------------------------|---------------------------------|---------------------------------|-----------------------------|-------------------------|---------------------|------------------|
| Parents |                               |                           |                               |                             |                                 |                                 |                             |                         |                     |                  |
| Round 1 | 59,09%                        | 64,29%                    | 66,67%                        | 66,67%                      | 73,68%                          | 50,00%                          | 54,55%                      | 86,67%                  | 65,20%              | 63,70%           |
| Round 2 | 64,70%                        | 85,70%                    | 53,80%                        | 66,70%                      | 64,70%                          | 46,20%                          | 71,40%                      | 70,00%                  | 65,40%              | 63,30%           |

|          | Australia<br>R1 = 18<br>R2 = 14 | Canada<br>R1 = 19<br>R2 = 17 | UK<br>R1 = 26<br>R2 = 20 | Finland<br>R1 = 19<br>R2 = 19 | France<br>R1 = 23<br>R2 = 18 | Malaysia<br>R1 = 34<br>R2= 34 | Netherlands<br>R1 = 24<br>R2 = 21 | Singapore<br>R1 = 32<br>R2 = 20 | Sweden<br>R1 = 19<br>R2 = 19 | USA<br>R1= 31<br>R2= 27 | Weighted<br>Average | Total<br>average |
|----------|---------------------------------|------------------------------|--------------------------|-------------------------------|------------------------------|-------------------------------|-----------------------------------|---------------------------------|------------------------------|-------------------------|---------------------|------------------|
| Surgeons |                                 |                              |                          |                               |                              |                               |                                   |                                 |                              |                         |                     |                  |
| Round 1  | 38,90%                          | 47,40%                       | 11,50%                   | 26,30%                        | 56,50%                       | 44,10%                        | 29,20%                            | 19,40%                          | 21,10%                       | 48,40%                  | 34,28%              | 34,40%           |
| Round 2  | 50,00%                          | 47,06%                       | 10,00%                   | 26,32%                        | 50,00%                       | 39,39%                        | 33,33%                            | 15,00%                          | 21,05%                       | 48,15%                  | 34,03%              | 34,10%           |

### Bacterial isolates during surgery

|         | Australia<br>R1= 23<br>R2= 17 | Canada<br>R1= 19<br>R2= 7 | Finland<br>R1 = 13<br>R2 = 13 | Malaysia<br>R1= 10<br>R2= 6 | Netherlands<br>R1= 20<br>R2= 17 | Singapore<br>R1 = 32<br>R2 = 13 | Sweden<br>R1 = 10<br>R2 = 8 | USA<br>R1= 15<br>R2= 10 | Weighted<br>Average | Total<br>average |
|---------|-------------------------------|---------------------------|-------------------------------|-----------------------------|---------------------------------|---------------------------------|-----------------------------|-------------------------|---------------------|------------------|
| Parents |                               |                           |                               |                             |                                 |                                 |                             |                         |                     |                  |
| Round 1 | 57,14%                        | 60,00%                    | 69,23%                        | 58,33%                      | 73,33%                          | 54,84%                          | 75,00%                      | 82,35%                  | 66,28%              | 64,71%           |
| Round 2 | 37,50%                        | 28,60%                    | 41,70%                        | 83,30%                      | 62,50%                          | 41,70%                          | 42,90%                      | 70,00%                  | 51,03%              | 50,00%           |

|          | Australia<br>R1 = 18<br>R2 = 14 | Canada<br>R1 = 19<br>R2 = 17 | UK<br>R1 = 26<br>R2 = 20 | Finland<br>R1 = 19<br>R2 = 19 | France<br>R1 = 23<br>R2 = 18 | Malaysia<br>R1 = 34<br>R2= 34 | Netherlands<br>R1 = 24<br>R2 = 21 | Singapore<br>R1 = 32<br>R2 = 20 | Sweden<br>R1 = 19<br>R2 = 19 | USA<br>R1= 31<br>R2= 27 | Weighted<br>Average | Total<br>average |
|----------|---------------------------------|------------------------------|--------------------------|-------------------------------|------------------------------|-------------------------------|-----------------------------------|---------------------------------|------------------------------|-------------------------|---------------------|------------------|
| Surgeons |                                 |                              |                          |                               |                              |                               |                                   |                                 |                              |                         |                     |                  |
| Round 1  | 11,11%                          | 5,26%                        | 15,38%                   | 10,53%                        | 0,00%                        | 8,82%                         | 4,17%                             | 6,25%                           | 5,26%                        | 3,33%                   | 7,01%               | 7,00%            |
| Round 2  | 14,29%                          | 0,00%                        | 10,00%                   | 10,53%                        | 0,00%                        | 5,88%                         | 0,00%                             | 5,00%                           | 5,26%                        | 0,00%                   | 5,10%               | 4,80%            |

### Bladder catheterization time

|         | Australia<br>R1= 23<br>R2= 17 | Canada<br>R1= 19<br>R2= 7 | Finland<br>R1 = 13<br>R2 = 13 | Malaysia<br>R1= 10<br>R2= 6 | Netherlands<br>R1= 20<br>R2= 17 | Singapore<br>R1 = 32<br>R2 = 13 | Sweden<br>R1 = 10<br>R2 = 8 | USA<br>R1= 15<br>R2= 10 | Weighted<br>Average | Total<br>average |
|---------|-------------------------------|---------------------------|-------------------------------|-----------------------------|---------------------------------|---------------------------------|-----------------------------|-------------------------|---------------------|------------------|
| Parents |                               |                           |                               |                             |                                 |                                 |                             |                         |                     |                  |
| Round 1 | 52,63%                        | 41,67%                    | 30,77%                        | 33,33%                      | 41,67%                          | 41,38%                          | 30,77%                      | 70,59%                  | 42,85%              | 44,35%           |
| Round 2 | 28,60%                        | 33,30%                    | 7,70%                         | 0,00%                       | 7,10%                           | 36,40%                          | 14,30%                      | 60,00%                  | 23,43%              | 24,10%           |

|          | Australia<br>R1 = 18<br>R2 = 14 | Canada<br>R1 = 19<br>R2 = 17 | UK<br>R1 = 26<br>R2 = 20 | Finland<br>R1 = 19<br>R2 = 19 | France<br>R1 = 23<br>R2 = 18 | Malaysia<br>R1 = 34<br>R2= 34 | Netherlands<br>R1 = 24<br>R2 = 21 | Singapore<br>R1 = 32<br>R2 = 20 | Sweden<br>R1 = 19<br>R2 = 19 | USA<br>R1= 31<br>R2= 27 | Weighted<br>Average | Total<br>average |
|----------|---------------------------------|------------------------------|--------------------------|-------------------------------|------------------------------|-------------------------------|-----------------------------------|---------------------------------|------------------------------|-------------------------|---------------------|------------------|
| Surgeons |                                 |                              |                          |                               |                              |                               |                                   |                                 |                              |                         |                     |                  |
| Round 1  | 11,11%                          | 5,56%                        | 7,69%                    | 0,00%                         | 0,00%                        | 9,09%                         | 8,70%                             | 9,38%                           | 0,00%                        | 0,00%                   | 5,15%               | 5,44%            |
| Round 2  | 7,14%                           | 6,25%                        | 5,00%                    | 0,00%                         | 0,00%                        | 9,09%                         | 5,00%                             | 5,26%                           | 0,00%                        | 0,00%                   | 3,77%               | 3,90%            |

### Blood loss during surgery

|         | Australia<br>R1= 23<br>R2= 17 | Canada<br>R1= 19<br>R2= 7 | Finland<br>R1 = 13<br>R2 = 13 | Malaysia<br>R1= 10<br>R2= 6 | Netherlands<br>R1= 20<br>R2= 17 | Singapore<br>R1 = 32<br>R2 = 13 | Sweden<br>R1 = 10<br>R2 = 8 | USA<br>R1= 15<br>R2= 10 | Weighted<br>Average | Total<br>average |
|---------|-------------------------------|---------------------------|-------------------------------|-----------------------------|---------------------------------|---------------------------------|-----------------------------|-------------------------|---------------------|------------------|
| Parents |                               |                           |                               |                             |                                 |                                 |                             |                         |                     |                  |
| Round 1 | 52,38%                        | 64,29%                    | 38,46%                        | 50,00%                      | 78,57%                          | 54,84%                          | 84,62%                      | 82,35%                  | 63,19%              | 62,22%           |
| Round 2 | 35,29%                        | 57,14%                    | 23,08%                        | 50,00%                      | 41,18%                          | 38,46%                          | 75,00%                      | 70,00%                  | 48,77%              | 45,10%           |

|          | Australia<br>R1 = 18<br>R2 = 14 | Canada<br>R1 = 19<br>R2 = 17 | UK<br>R1 = 26<br>R2 = 20 | Finland<br>R1 = 19<br>R2 = 19 | France<br>R1 = 23<br>R2 = 18 | Malaysia<br>R1 = 34<br>R2= 34 | Netherlands<br>R1 = 24<br>R2 = 21 | Singapore<br>R1 = 32<br>R2 = 20 | Sweden<br>R1 = 19<br>R2 = 19 | USA<br>R1= 31<br>R2= 27 | Weighted<br>Average | Total<br>average |
|----------|---------------------------------|------------------------------|--------------------------|-------------------------------|------------------------------|-------------------------------|-----------------------------------|---------------------------------|------------------------------|-------------------------|---------------------|------------------|
| Surgeons |                                 |                              |                          |                               |                              |                               |                                   |                                 |                              |                         |                     |                  |
| Round 1  | 23,50%                          | 5,30%                        | 19,20%                   | 47,40%                        | 23,80%                       | 23,50%                        | 12,50%                            | 34,40%                          | 38,90%                       | 9,70%                   | 23,82%              | 23,20%           |
| Round 2  | 23,08%                          | 5,88%                        | 20,00%                   | 31,58%                        | 23,53%                       | 29,41%                        | 4,76%                             | 10,00%                          | 26,32%                       | 3,70%                   | 17,83%              | 17,90%           |

### Complications directly related to treatment

|         | Australia<br>R1= 23<br>R2= 17 | Canada<br>R1= 19<br>R2= 7 | Finland<br>R1 = 13<br>R2 = 13 | Malaysia<br>R1= 10<br>R2= 6 | Netherlands<br>R1= 20<br>R2= 17 | Singapore<br>R1 = 32<br>R2 = 13 | Sweden<br>R1 = 10<br>R2 = 8 | USA<br>R1= 15<br>R2= 10 | Weighted<br>Average | Total<br>average |
|---------|-------------------------------|---------------------------|-------------------------------|-----------------------------|---------------------------------|---------------------------------|-----------------------------|-------------------------|---------------------|------------------|
| Parents |                               |                           |                               |                             |                                 |                                 |                             |                         |                     |                  |
| Round 1 | 86,36%                        | 73,33%                    | 76,92%                        | 54,55%                      | 94,12%                          | 67,74%                          | 76,92%                      | 83,33%                  | 76,66%              | 77,10%           |
| Round 2 | NA                            | NA                        | NA                            | NA                          | NA                              | NA                              | NA                          | NA                      | NA                  | NA               |

|          | Australia<br>R1 = 18<br>R2 = 14 | Canada<br>R1 = 19<br>R2 = 17 | UK<br>R1 = 26<br>R2 = 20 | Finland<br>R1 = 19<br>R2 = 19 | France<br>R1 = 23<br>R2 = 18 | Malaysia<br>R1 = 34<br>R2= 34 | Netherlands<br>R1 = 24<br>R2 = 21 | Singapore<br>R1 = 32<br>R2 = 20 | Sweden<br>R1 = 19<br>R2 = 19 | USA<br>R1 = 31<br>R2= 27 | Weighted<br>Average | Total<br>average |
|----------|---------------------------------|------------------------------|--------------------------|-------------------------------|------------------------------|-------------------------------|-----------------------------------|---------------------------------|------------------------------|--------------------------|---------------------|------------------|
| Surgeons |                                 |                              |                          |                               |                              |                               |                                   |                                 |                              |                          |                     |                  |
| Round 1  | 61,11%                          | 89,47%                       | 73,08%                   | 72,22%                        | 72,73%                       | 61,76%                        | 75,00%                            | 59,38%                          | 89,47%                       | 77,42%                   | 73,16%              | 72,00%           |
| Round 2  | NA                              | NA                           | NA                       | NA                            | NA                           | NA                            | NA                                | NA                              | NA                           | NA                       | NA                  | NA               |

### Children developing complicated appendicitis

|         | Australia<br>R1= 23<br>R2= 17 | Canada<br>R1= 19<br>R2= 7 | Finland<br>R1 = 13<br>R2 = 13 | Malaysia<br>R1= 10<br>R2= 6 | Netherlands<br>R1= 20<br>R2= 17 | Singapore<br>R1 = 32<br>R2 = 13 | Sweden<br>R1 = 10<br>R2 = 8 | USA<br>R1 = 15<br>R2= 10 | Weighted<br>Average | Total<br>average |
|---------|-------------------------------|---------------------------|-------------------------------|-----------------------------|---------------------------------|---------------------------------|-----------------------------|--------------------------|---------------------|------------------|
| Parents |                               |                           |                               |                             |                                 |                                 |                             |                          |                     |                  |
| Round 1 | 81,82%                        | 80,00%                    | 83,33%                        | 66,67%                      | 100,00%                         | 67,74%                          | 75,00%                      | 88,89%                   | 80,43%              | 79,90%           |
| Round 2 | NA                            | NA                        | NA                            | NA                          | NA                              | NA                              | NA                          | NA                       | NA                  | NA               |

|          | Australia<br>R1 = 18<br>R2 = 14 | Canada<br>R1 = 19<br>R2 = 17 | UK<br>R1 = 26<br>R2 = 20 | Finland<br>R1 = 19<br>R2 = 19 | France<br>R1 = 23<br>R2 = 18 | Malaysia<br>R1 = 34<br>R2= 34 | Netherlands<br>R1 = 24<br>R2 = 21 | Singapore<br>R1 = 32<br>R2 = 20 | Sweden<br>R1 = 19<br>R2 = 19 | USA<br>R1 = 31<br>R2= 27 | Weighted<br>Average | Total<br>average |
|----------|---------------------------------|------------------------------|--------------------------|-------------------------------|------------------------------|-------------------------------|-----------------------------------|---------------------------------|------------------------------|--------------------------|---------------------|------------------|
| Surgeons |                                 |                              |                          |                               |                              |                               |                                   |                                 |                              |                          |                     |                  |
| Round 1  | 72,22%                          | 72,22%                       | 65,38%                   | 89,47%                        | 90,91%                       | 94,12%                        | 95,83%                            | 78,13%                          | 84,21%                       | 78,57%                   | 82,11%              | 82,50%           |
| Round 2  | NA                              | NA                           | NA                       | NA                            | NA                           | NA                            | NA                                | NA                              | NA                           | NA                       | NA                  | NA               |

### Child away from normal daily activities/school

|         | Australia<br>R1= 23<br>R2= 17 | Canada<br>R1= 19<br>R2= 7 | Finland<br>R1 = 13<br>R2 = 13 | Malaysia<br>R1= 10<br>R2= 6 | Netherlands<br>R1= 20<br>R2= 17 | Singapore<br>R1 = 32<br>R2 = 13 | Sweden<br>R1 = 10<br>R2 = 8 | USA<br>R1= 15<br>R2= 10 | Weighted<br>Average | Total<br>average |
|---------|-------------------------------|---------------------------|-------------------------------|-----------------------------|---------------------------------|---------------------------------|-----------------------------|-------------------------|---------------------|------------------|
| Parents |                               |                           |                               |                             |                                 |                                 |                             |                         |                     |                  |
| Round 1 | 36,36%                        | 64,29%                    | 30,77%                        | 50,00%                      | 73,68%                          | 46,67%                          | 46,15%                      | 73,33%                  | 52,66%              | 52,17%           |
| Round 2 | 35,30%                        | 71,40%                    | 23,10%                        | 100,00%                     | 52,90%                          | 38,50%                          | 37,50%                      | 50,00%                  | 51,09%              | 46,20%           |

|          | Australia<br>R1 = 18<br>R2 = 14 | Canada<br>R1 = 19<br>R2 = 17 | UK<br>R1 = 26<br>R2 = 20 | Finland<br>R1 = 19<br>R2 = 19 | France<br>R1 = 23<br>R2 = 18 | Malaysia<br>R1 = 34<br>R2= 34 | Netherlands<br>R1 = 24<br>R2 = 21 | Singapore<br>R1 = 32<br>R2 = 20 | Sweden<br>R1 = 19<br>R2 = 19 | USA<br>R1 = 31<br>R2= 27 | Weighted<br>Average | Total<br>average |
|----------|---------------------------------|------------------------------|--------------------------|-------------------------------|------------------------------|-------------------------------|-----------------------------------|---------------------------------|------------------------------|--------------------------|---------------------|------------------|
| Surgeons |                                 |                              |                          |                               |                              |                               |                                   |                                 |                              |                          |                     |                  |
| Round 1  | 27,78%                          | 68,42%                       | 38,46%                   | 31,58%                        | 60,87%                       | 44,12%                        | 62,50%                            | 51,61%                          | 26,32%                       | 74,19%                   | 48,58%              | 50,00%           |
| Round 2  | 28,57%                          | 76,47%                       | 30,00%                   | 26,32%                        | 50,00%                       | 44,12%                        | 76,19%                            | 60,00%                          | 31,58%                       | 77,78%                   | 50,10%              | 51,20%           |

### Conversion laparoscopic to open surgery

|         | Australia<br>R1= 23<br>R2= 17 | Canada<br>R1= 19<br>R2= 7 |  | Finland<br>R1 = 13<br>R2 = 13 |  | Malaysia<br>R1= 10<br>R2= 6 | Netherlands<br>R1= 20<br>R2= 17 | Singapore<br>R1 = 32<br>R2 = 13 | Sweden<br>R1 = 10<br>R2 = 8 | USA<br>R1= 15<br>R2= 10 | Weighted<br>Average | Total<br>average |
|---------|-------------------------------|---------------------------|--|-------------------------------|--|-----------------------------|---------------------------------|---------------------------------|-----------------------------|-------------------------|---------------------|------------------|
| Parents |                               |                           |  |                               |  |                             |                                 |                                 |                             |                         |                     |                  |
| Round 1 | 80,95%                        | 85,71%                    |  | 75,00%                        |  | 83,33%                      | 88,24%                          | 65,52%                          | 63,64%                      | 71,43%                  | 76,73%              | 76,15%           |
| Round 2 | 81,30%                        | 85,70%                    |  | 84,60%                        |  | 100,00%                     | 92,90%                          | 84,60%                          | 57,10%                      | 66,70%                  | 81,61%              | 82,40%           |

|          | Australia<br>R1 = 18<br>R2 = 14 | Canada<br>R1 = 19<br>R2 = 17 | UK<br>R1 = 26<br>R2 = 20 | Finland<br>R1 = 19<br>R2 = 19 | France<br>R1 = 23<br>R2 = 18 | Malaysia<br>R1 = 34<br>R2= 34 | Netherlands<br>R1 = 24<br>R2 = 21 | Singapore<br>R1 = 32<br>R2 = 20 | Sweden<br>R1 = 19<br>R2 = 19 | USA<br>R1= 31<br>R2= 27 | Weighted<br>Average | Total<br>average |
|----------|---------------------------------|------------------------------|--------------------------|-------------------------------|------------------------------|-------------------------------|-----------------------------------|---------------------------------|------------------------------|-------------------------|---------------------|------------------|
| Surgeons |                                 |                              |                          |                               |                              |                               |                                   |                                 |                              |                         |                     |                  |
| Round 1  | 38,89%                          | 68,42%                       | 15,38%                   | 21,05%                        | 34,78%                       | 32,35%                        | 16,67%                            | 48,39%                          | 10,53%                       | 58,06%                  | 34,45%              | 35,25%           |
| Round 2  | 42,86%                          | 47,06%                       | 10,00%                   | 21,05%                        | 33,33%                       | 36,36%                        | 19,05%                            | 25,00%                          | 10,53%                       | 55,56%                  | 30,08%              | 30,80%           |

### Cosmesis

|         | Australia<br>R1= 23<br>R2= 17 | Canada<br>R1= 19<br>R2= 7 |  | Finland<br>R1 = 13<br>R2 = 13 |  | Malaysia<br>R1= 10<br>R2= 6 | Netherlands<br>R1= 20<br>R2= 17 | Singapore<br>R1 = 32<br>R2 = 13 | Sweden<br>R1 = 10<br>R2 = 8 | USA<br>R1= 15<br>R2= 10 | Weighted<br>Average | Total<br>average |
|---------|-------------------------------|---------------------------|--|-------------------------------|--|-----------------------------|---------------------------------|---------------------------------|-----------------------------|-------------------------|---------------------|------------------|
| Parents |                               |                           |  |                               |  |                             |                                 |                                 |                             |                         |                     |                  |
| Round 1 | 13,64%                        | 35,71%                    |  | 0,00%                         |  | 50,00%                      | 36,84%                          | 33,33%                          | 30,77%                      | 40,00%                  | 30,04%              | 29,71%           |
| Round 2 | 11,76%                        | 28,57%                    |  | 0,00%                         |  | 50,00%                      | 17,65%                          | 25,00%                          | 25,00%                      | 10,00%                  | 21,00%              | 17,80%           |

|          | Australia<br>R1 = 18<br>R2 = 14 | Canada<br>R1 = 19<br>R2 = 17 | UK<br>R1 = 26<br>R2 = 20 | Finland<br>R1 = 19<br>R2 = 19 | France<br>R1 = 23<br>R2 = 18 | Malaysia<br>R1 = 34<br>R2= 34 | Netherlands<br>R1 = 24<br>R2 = 21 | Singapore<br>R1 = 32<br>R2 = 20 | Sweden<br>R1 = 19<br>R2 = 19 | USA<br>R1= 31<br>R2= 27 | Weighted<br>Average | Total<br>average |
|----------|---------------------------------|------------------------------|--------------------------|-------------------------------|------------------------------|-------------------------------|-----------------------------------|---------------------------------|------------------------------|-------------------------|---------------------|------------------|
| Surgeons |                                 |                              |                          |                               |                              |                               |                                   |                                 |                              |                         |                     |                  |
| Round 1  | 5,56%                           | 15,79%                       | 15,38%                   | 10,53%                        | 26,09%                       | 17,65%                        | 20,83%                            | 16,13%                          | 21,05%                       | 25,81%                  | 17,48%              | 18,03%           |
| Round 2  | 14,30%                          | 17,60%                       | 15,00%                   | 5,30%                         | 16,70%                       | 17,60%                        | 14,30%                            | 5,00%                           | 15,80%                       | 14,80%                  | 13,64%              | 13,90%           |

### Cost effectiveness

|         | Australia<br>R1= 23<br>R2= 17 | Canada<br>R1= 19<br>R2= 7 |  | Finland<br>R1 = 13<br>R2 = 13 |  | Malaysia<br>R1= 10<br>R2= 6 | Netherlands<br>R1= 20<br>R2= 17 | Singapore<br>R1 = 32<br>R2 = 13 | Sweden<br>R1 = 10<br>R2 = 8 | USA<br>R1= 15<br>R2= 10 | Weighted<br>Average | Total<br>average |
|---------|-------------------------------|---------------------------|--|-------------------------------|--|-----------------------------|---------------------------------|---------------------------------|-----------------------------|-------------------------|---------------------|------------------|
| Parents |                               |                           |  |                               |  |                             |                                 |                                 |                             |                         |                     |                  |
| Round 1 | 27,27%                        | 50,00%                    |  | 8,33%                         |  | 58,33%                      | 33,33%                          | 53,33%                          | 10,00%                      | 66,67%                  | 38,41%              | 40,60%           |
| Round 2 | 23,50%                        | 42,90%                    |  | 0,00%                         |  | 83,30%                      | 23,50%                          | 38,50%                          | 0,00%                       | 40,00%                  | 31,46%              | 28,10%           |

|          | Australia<br>R1 = 18<br>R2 = 14 | Canada<br>R1 = 19<br>R2 = 17 | UK<br>R1 = 26<br>R2 = 20 | Finland<br>R1 = 19<br>R2 = 19 | France<br>R1 = 23<br>R2 = 18 | Malaysia<br>R1 = 34<br>R2= 34 | Netherlands<br>R1 = 24<br>R2 = 21 | Singapore<br>R1 = 32<br>R2 = 20 | Sweden<br>R1 = 19<br>R2 = 19 | USA<br>R1= 31<br>R2= 27 | Weighted<br>Average | Total<br>average |
|----------|---------------------------------|------------------------------|--------------------------|-------------------------------|------------------------------|-------------------------------|-----------------------------------|---------------------------------|------------------------------|-------------------------|---------------------|------------------|
| Surgeons |                                 |                              |                          |                               |                              |                               |                                   |                                 |                              |                         |                     |                  |
| Round 1  | 47,06%                          | 68,42%                       | 38,46%                   | 47,37%                        | 39,13%                       | 41,18%                        | 66,67%                            | 48,39%                          | 42,11%                       | 77,42%                  | 51,62%              | 51,85%           |
| Round 2  | 42,90%                          | 70,60%                       | 40,00%                   | 47,40%                        | 33,30%                       | 42,40%                        | 61,90%                            | 35,00%                          | 47,40%                       | 74,10%                  | 49,50%              | 50,00%           |

### Central venous catheter

|         | Australia<br>R1= 23<br>R2= 17 | Canada<br>R1= 19<br>R2= 7 | Finland<br>R1= 13<br>R2= 13 | Malaysia<br>R1= 10<br>R2= 6 | Netherlands<br>R1= 20<br>R2= 17 | Singapore<br>R1= 32<br>R2= 13 | Sweden<br>R1= 10<br>R2= 8 | USA<br>R1= 15<br>R2= 10 | Weighted<br>Average | Total<br>average |
|---------|-------------------------------|---------------------------|-----------------------------|-----------------------------|---------------------------------|-------------------------------|---------------------------|-------------------------|---------------------|------------------|
| Parents |                               |                           |                             |                             |                                 |                               |                           |                         |                     |                  |
| Round 1 | 65,00%                        | 57,14%                    | 50,00%                      | 36,36%                      | 64,29%                          | 42,86%                        | 50,00%                    | 80,00%                  | 55,71%              | 55,65%           |
| Round 2 | 68,80%                        | 42,90%                    | 58,30%                      | 50,00%                      | 78,60%                          | 61,50%                        | 71,40%                    | 60,00%                  | 61,44%              | 63,50%           |

|          | Australia<br>R1 = 18<br>R2 = 14 | Canada<br>R1 = 19<br>R2 = 17 | UK<br>R1 = 26<br>R2 = 20 | Finland<br>R1 = 19<br>R2 = 19 | France<br>R1 = 23<br>R2 = 18 | Malaysia<br>R1 = 34<br>R2= 34 | Netherlands<br>R1 = 24<br>R2 = 21 | Singapore<br>R1 = 32<br>R2 = 20 | Sweden<br>R1 = 19<br>R2 = 19 | USA<br>R1= 31<br>R2= 27 | Weighted<br>Average | Total<br>average |
|----------|---------------------------------|------------------------------|--------------------------|-------------------------------|------------------------------|-------------------------------|-----------------------------------|---------------------------------|------------------------------|-------------------------|---------------------|------------------|
| Surgeons |                                 |                              |                          |                               |                              |                               |                                   |                                 |                              |                         |                     |                  |
| Round 1  | 72,22%                          | 42,11%                       | 44,00%                   | 42,11%                        | 50,00%                       | 18,18%                        | 50,00%                            | 35,48%                          | 31,58%                       | 56,67%                  | 44,23%              | 42,92%           |
| Round 2  | 50,00%                          | 41,18%                       | 50,00%                   | 52,63%                        | 38,89%                       | 25,00%                        | 52,38%                            | 30,00%                          | 31,58%                       | 59,26%                  | 43,09%              | 42,50%           |

### Death

|         | Australia<br>R1= 23<br>R2= 17 | Canada<br>R1= 19<br>R2= 7 | Finland<br>R1= 13<br>R2= 13 | Malaysia<br>R1= 10<br>R2= 6 | Netherlands<br>R1= 20<br>R2= 17 | Singapore<br>R1= 32<br>R2= 13 | Sweden<br>R1= 10<br>R2= 8 | USA<br>R1= 15<br>R2= 10 | Weighted<br>Average | Total<br>average |
|---------|-------------------------------|---------------------------|-----------------------------|-----------------------------|---------------------------------|-------------------------------|---------------------------|-------------------------|---------------------|------------------|
| Parents |                               |                           |                             |                             |                                 |                               |                           |                         |                     |                  |
| Round 1 | 100,00%                       | 92,86%                    | 100,00%                     | 83,33%                      | 84,21%                          | 83,87%                        | 100,00%                   | 100,00%                 | 93,03%              | 92,00%           |
| Round 2 | NA                            | NA                        | NA                          | NA                          | NA                              | NA                            | NA                        | NA                      | NA                  | NA               |

|          | Australia<br>R1 = 18<br>R2 = 14 | Canada<br>R1 = 19<br>R2 = 17 | UK<br>R1 = 26<br>R2 = 20 | Finland<br>R1 = 19<br>R2 = 19 | France<br>R1 = 23<br>R2 = 18 | Malaysia<br>R1 = 34<br>R2= 34 | Netherlands<br>R1 = 24<br>R2 = 21 | Singapore<br>R1 = 32<br>R2 = 20 | Sweden<br>R1 = 19<br>R2 = 19 | USA<br>R1= 31<br>R2= 27 | Weighted<br>Average | Total<br>average |
|----------|---------------------------------|------------------------------|--------------------------|-------------------------------|------------------------------|-------------------------------|-----------------------------------|---------------------------------|------------------------------|-------------------------|---------------------|------------------|
| Surgeons |                                 |                              |                          |                               |                              |                               |                                   |                                 |                              |                         |                     |                  |
| Round 1  | 100,00%                         | 89,47%                       | 96,15%                   | 100,00%                       | 90,91%                       | 100,00%                       | 100,00%                           | 96,67%                          | 94,74%                       | 96,67%                  | 96,46%              | 96,70%           |
| Round 2  | NA                              | NA                           | NA                       | NA                            | NA                           | NA                            | NA                                | NA                              | NA                           | NA                      | NA                  | NA               |

### Mental health problems

|         | Australia<br>R1= 23<br>R2= 17 | Canada<br>R1= 19<br>R2= 7 | Finland<br>R1= 13<br>R2= 13 | Malaysia<br>R1= 10<br>R2= 6 | Netherlands<br>R1= 20<br>R2= 17 | Singapore<br>R1= 32<br>R2= 13 | Sweden<br>R1= 10<br>R2= 8 | USA<br>R1= 15<br>R2= 10 | Weighted<br>Average | Total<br>average |
|---------|-------------------------------|---------------------------|-----------------------------|-----------------------------|---------------------------------|-------------------------------|---------------------------|-------------------------|---------------------|------------------|
| Parents |                               |                           |                             |                             |                                 |                               |                           |                         |                     |                  |
| Round 1 |                               | NA                        | NA                          | NA                          | NA                              | NA                            | NA                        | NA                      | NA                  | NA               |
| Round 2 | 58,82%                        | 57,14%                    | 15,38%                      | 50,00%                      | 35,29%                          | 50,00%                        | 66,67%                    | 30,00%                  | 45,41%              | 43,20%           |

|          | Australia<br>R1 = 18<br>R2 = 14 | Canada<br>R1 = 19<br>R2 = 17 | UK<br>R1 = 26<br>R2 = 20 | Finland<br>R1 = 19<br>R2 = 19 | France<br>R1 = 23<br>R2 = 18 | Malaysia<br>R1 = 34<br>R2= 34 | Netherlands<br>R1 = 24<br>R2 = 21 | Singapore<br>R1 = 32<br>R2 = 20 | Sweden<br>R1 = 19<br>R2 = 19 | USA<br>R1= 31<br>R2= 27 | Weighted<br>Average | Total<br>average |
|----------|---------------------------------|------------------------------|--------------------------|-------------------------------|------------------------------|-------------------------------|-----------------------------------|---------------------------------|------------------------------|-------------------------|---------------------|------------------|
| Surgeons |                                 |                              |                          |                               |                              |                               |                                   |                                 |                              |                         |                     |                  |
| Round 1  | NA                              | NA                           | NA                       | NA                            | NA                           | NA                            | NA                                | NA                              | NA                           | NA                      | NA                  | NA               |
| Round 2  | 21,43%                          | 41,18%                       | 31,58%                   | 15,79%                        | 37,50%                       | 50,00%                        | 23,81%                            | 25,00%                          | 41,18%                       | 25,93%                  | 31,34%              | 32,20%           |

### Duration antibiotic treatment

|         | Australia<br>R1= 23<br>R2= 17 | Canada<br>R1= 19<br>R2= 7 | Finland<br>R1 = 13<br>R2 = 13 | Malaysia<br>R1= 10<br>R2= 6 | Netherlands<br>R1= 20<br>R2= 17 | Singapore<br>R1 = 32<br>R2 = 13 | Sweden<br>R1 = 10<br>R2 = 8 | USA<br>R1= 15<br>R2= 10 | Weighted<br>Average | Total<br>average |
|---------|-------------------------------|---------------------------|-------------------------------|-----------------------------|---------------------------------|---------------------------------|-----------------------------|-------------------------|---------------------|------------------|
| Parents |                               |                           |                               |                             |                                 |                                 |                             |                         |                     |                  |
| Round 1 | 77,30%                        | 64,30%                    | 66,70%                        | 58,30%                      | 84,20%                          | 46,70%                          | 45,50%                      | 86,70%                  | 66,21%              | 65,90%           |
| Round 2 | 76,50%                        | 57,10%                    | 46,20%                        | 66,70%                      | 88,20%                          | 38,50%                          | 42,90%                      | 80,00%                  | 62,01%              | 64,40%           |

|          | Australia<br>R1 = 18<br>R2 = 14 | Canada<br>R1 = 19<br>R2 = 17 | UK<br>R1 = 26<br>R2 = 20 | Finland<br>R1 = 19<br>R2 = 19 | France<br>R1 = 23<br>R2 = 18 | Malaysia<br>R1 = 34<br>R2= 34 | Netherlands<br>R1 = 24<br>R2 = 21 | Singapore<br>R1 = 32<br>R2 = 20 | Sweden<br>R1 = 19<br>R2 = 19 | USA<br>R1= 31<br>R2= 27 | Weighted<br>Average | Total<br>average |
|----------|---------------------------------|------------------------------|--------------------------|-------------------------------|------------------------------|-------------------------------|-----------------------------------|---------------------------------|------------------------------|-------------------------|---------------------|------------------|
| Surgeons |                                 |                              |                          |                               |                              |                               |                                   |                                 |                              |                         |                     |                  |
| Round 1  | 44,44%                          | 63,16%                       | 30,77%                   | 26,32%                        | 56,52%                       | 29,41%                        | 29,17%                            | 35,48%                          | 31,58%                       | 50,00%                  | 39,69%              | 39,09%           |
| Round 2  | 42,86%                          | 52,94%                       | 30,00%                   | 26,32%                        | 44,44%                       | 27,27%                        | 19,05%                            | 25,00%                          | 26,32%                       | 59,26%                  | 35,35%              | 35,10%           |

### Duration home healthcare

|         | Australia<br>R1= 23<br>R2= 17 | Canada<br>R1= 19<br>R2= 7 | Finland<br>R1 = 13<br>R2 = 13 | Malaysia<br>R1= 10<br>R2= 6 | Netherlands<br>R1= 20<br>R2= 17 | Singapore<br>R1 = 32<br>R2 = 13 | Sweden<br>R1 = 10<br>R2 = 8 | USA<br>R1= 15<br>R2= 10 | Weighted<br>Average | Total<br>average |
|---------|-------------------------------|---------------------------|-------------------------------|-----------------------------|---------------------------------|---------------------------------|-----------------------------|-------------------------|---------------------|------------------|
| Parents |                               |                           |                               |                             |                                 |                                 |                             |                         |                     |                  |
| Round 1 | 31,82%                        | 57,14%                    | 38,46%                        | 36,36%                      | 52,94%                          | 50,00%                          | 30,77%                      | 66,67%                  | 45,52%              | 45,93%           |
| Round 2 | 29,40%                        | 57,10%                    | 15,40%                        | 50,00%                      | 29,40%                          | 38,50%                          | 12,50%                      | 50,00%                  | 35,29%              | 33,00%           |

|          | Australia<br>R1 = 18<br>R2 = 14 | Canada<br>R1 = 19<br>R2 = 17 | UK<br>R1 = 26<br>R2 = 20 | Finland<br>R1 = 19<br>R2 = 19 | France<br>R1 = 23<br>R2 = 18 | Malaysia<br>R1 = 34<br>R2= 34 | Netherlands<br>R1 = 24<br>R2 = 21 | Singapore<br>R1 = 32<br>R2 = 20 | Sweden<br>R1 = 19<br>R2 = 19 | USA<br>R1= 31<br>R2= 27 | Weighted<br>Average | Total<br>average |
|----------|---------------------------------|------------------------------|--------------------------|-------------------------------|------------------------------|-------------------------------|-----------------------------------|---------------------------------|------------------------------|-------------------------|---------------------|------------------|
| Surgeons |                                 |                              |                          |                               |                              |                               |                                   |                                 |                              |                         |                     |                  |
| Round 1  | 22,22%                          | 22,22%                       | 3,85%                    | 10,53%                        | 34,78%                       | 27,27%                        | 25,00%                            | 25,00%                          | 10,53%                       | 20,00%                  | 20,14%              | 20,59%           |
| Round 2  | 28,57%                          | 25,00%                       | 5,00%                    | 5,26%                         | 22,22%                       | 20,59%                        | 9,52%                             | 10,53%                          | 15,79%                       | 12,00%                  | 15,45%              | 15,10%           |

### Duration surgery/anesthesia

|         | Australia<br>R1= 23<br>R2= 17 | Canada<br>R1= 19<br>R2= 7 | Finland<br>R1 = 13<br>R2 = 13 | Malaysia<br>R1= 10<br>R2= 6 | Netherlands<br>R1= 20<br>R2= 17 | Singapore<br>R1 = 32<br>R2 = 13 | Sweden<br>R1 = 10<br>R2 = 8 | USA<br>R1= 15<br>R2= 10 | Weighted<br>Average | Total<br>average |
|---------|-------------------------------|---------------------------|-------------------------------|-----------------------------|---------------------------------|---------------------------------|-----------------------------|-------------------------|---------------------|------------------|
| Parents |                               |                           |                               |                             |                                 |                                 |                             |                         |                     |                  |
| Round 1 | 54,55%                        | 69,23%                    | 41,67%                        | 50,00%                      | 52,63%                          | 50,00%                          | 45,45%                      | 86,67%                  | 56,27%              | 55,97%           |
| Round 2 | 58,82%                        | 28,57%                    | 38,46%                        | 50,00%                      | 41,18%                          | 53,85%                          | 42,86%                      | 80,00%                  | 49,22%              | 50,00%           |

|          | Australia<br>R1 = 18<br>R2 = 14 | Canada<br>R1 = 19<br>R2 = 17 | UK<br>R1 = 26<br>R2 = 20 | Finland<br>R1 = 19<br>R2 = 19 | France<br>R1 = 23<br>R2 = 18 | Malaysia<br>R1 = 34<br>R2= 34 | Netherlands<br>R1 = 24<br>R2 = 21 | Singapore<br>R1 = 32<br>R2 = 20 | Sweden<br>R1 = 19<br>R2 = 19 | USA<br>R1= 31<br>R2= 27 | Weighted<br>Average | Total<br>average |
|----------|---------------------------------|------------------------------|--------------------------|-------------------------------|------------------------------|-------------------------------|-----------------------------------|---------------------------------|------------------------------|-------------------------|---------------------|------------------|
| Surgeons |                                 |                              |                          |                               |                              |                               |                                   |                                 |                              |                         |                     |                  |
| Round 1  | 33,33%                          | 15,79%                       | 7,69%                    | 26,32%                        | 39,13%                       | 35,29%                        | 12,50%                            | 29,03%                          | 15,79%                       | 32,26%                  | 24,71%              | 25,41%           |
| Round 2  | 28,57%                          | 23,53%                       | 5,00%                    | 15,79%                        | 27,78%                       | 33,33%                        | 14,29%                            | 25,00%                          | 15,79%                       | 22,22%                  | 21,13%              | 21,60%           |

### Healthcare visits

|         | Australia<br>R1= 23<br>R2= 17 | Canada<br>R1= 19<br>R2= 7 |  | Finland<br>R1 = 13<br>R2 = 13 |  | Malaysia<br>R1= 10<br>R2= 6 | Netherlands<br>R1= 20<br>R2= 17 | Singapore<br>R1 = 32<br>R2 = 13 | Sweden<br>R1 = 10<br>R2 = 8 | USA<br>R1= 15<br>R2= 10 | Weighted<br>Average | Total<br>average |
|---------|-------------------------------|---------------------------|--|-------------------------------|--|-----------------------------|---------------------------------|---------------------------------|-----------------------------|-------------------------|---------------------|------------------|
| Parents |                               |                           |  |                               |  |                             |                                 |                                 |                             |                         |                     |                  |
| Round 1 | 50,00%                        | 57,14%                    |  | 8,33%                         |  | 50,00%                      | 50,00%                          | 43,33%                          | 45,45%                      | 66,67%                  | 46,37%              | 47,01%           |
| Round 2 | 35,29%                        | 42,86%                    |  | 0,00%                         |  | 33,33%                      | 29,41%                          | 41,67%                          | 0,00%                       | 60,00%                  | 30,32%              | 30,30%           |

|          | Australia<br>R1 = 18<br>R2 = 14 | Canada<br>R1 = 19<br>R2 = 17 | UK<br>R1 = 26<br>R2 = 20 | Finland<br>R1 = 19<br>R2 = 19 | France<br>R1 = 23<br>R2 = 18 | Malaysia<br>R1 = 34<br>R2= 34 | Netherlands<br>R1 = 24<br>R2 = 21 | Singapore<br>R1 = 32<br>R2 = 20 | Sweden<br>R1 = 19<br>R2 = 19 | USA<br>R1= 31<br>R2= 27 | Weighted<br>Average | Total<br>average |
|----------|---------------------------------|------------------------------|--------------------------|-------------------------------|------------------------------|-------------------------------|-----------------------------------|---------------------------------|------------------------------|-------------------------|---------------------|------------------|
| Surgeons |                                 |                              |                          |                               |                              |                               |                                   |                                 |                              |                         |                     |                  |
| Round 1  | 22,22%                          | 57,89%                       | 15,38%                   | 36,84%                        | 13,04%                       | 23,53%                        | 37,50%                            | 36,67%                          | 26,32%                       | 54,84%                  | 32,42%              | 32,51%           |
| Round 2  | 21,43%                          | 58,82%                       | 10,00%                   | 42,11%                        | 11,11%                       | 12,12%                        | 23,81%                            | 25,00%                          | 15,79%                       | 26,92%                  | 24,71%              | 23,70%           |

### Histologically normal appendixes

|         | Australia<br>R1= 23<br>R2= 17 | Canada<br>R1= 19<br>R2= 7 |  | Finland<br>R1 = 13<br>R2 = 13 |  | Malaysia<br>R1= 10<br>R2= 6 | Netherlands<br>R1= 20<br>R2= 17 | Singapore<br>R1 = 32<br>R2 = 13 | Sweden<br>R1 = 10<br>R2 = 8 | USA<br>R1= 15<br>R2= 10 | Weighted<br>Average | Total<br>average |
|---------|-------------------------------|---------------------------|--|-------------------------------|--|-----------------------------|---------------------------------|---------------------------------|-----------------------------|-------------------------|---------------------|------------------|
| Parents |                               |                           |  |                               |  |                             |                                 |                                 |                             |                         |                     |                  |
| Round 1 | 60,00%                        | 84,62%                    |  | 46,15%                        |  | 54,55%                      | 75,00%                          | 45,16%                          | 69,23%                      | 75,00%                  | 63,71%              | 61,65%           |
| Round 2 | 41,18%                        | 66,67%                    |  | 15,38%                        |  | 50,00%                      | 62,50%                          | 38,46%                          | 87,50%                      | 80,00%                  | 55,21%              | 51,70%           |

|          | Australia<br>R1 = 18<br>R2 = 14 | Canada<br>R1 = 19<br>R2 = 17 | UK<br>R1 = 26<br>R2 = 20 | Finland<br>R1 = 19<br>R2 = 19 | France<br>R1 = 23<br>R2 = 18 | Malaysia<br>R1 = 34<br>R2= 34 | Netherlands<br>R1 = 24<br>R2 = 21 | Singapore<br>R1 = 32<br>R2 = 20 | Sweden<br>R1 = 19<br>R2 = 19 | USA<br>R1= 31<br>R2= 27 | Weighted<br>Average | Total<br>average |
|----------|---------------------------------|------------------------------|--------------------------|-------------------------------|------------------------------|-------------------------------|-----------------------------------|---------------------------------|------------------------------|-------------------------|---------------------|------------------|
| Surgeons |                                 |                              |                          |                               |                              |                               |                                   |                                 |                              |                         |                     |                  |
| Round 1  | 29,41%                          | 26,32%                       | 38,46%                   | 42,11%                        | 40,91%                       | 47,06%                        | 29,17%                            | 25,00%                          | 36,84%                       | 38,71%                  | 35,40%              | 35,80%           |
| Round 2  | 35,71%                          | 35,29%                       | 40,00%                   | 42,11%                        | 50,00%                       | 50,00%                        | 38,10%                            | 35,00%                          | 44,44%                       | 29,63%                  | 40,03%              | 40,40%           |

### Hospital length of stay

|         | Australia<br>R1= 23<br>R2= 17 | Canada<br>R1= 19<br>R2= 7 |  | Finland<br>R1 = 13<br>R2 = 13 |  | Malaysia<br>R1= 10<br>R2= 6 | Netherlands<br>R1= 20<br>R2= 17 | Singapore<br>R1 = 32<br>R2 = 13 | Sweden<br>R1 = 10<br>R2 = 8 | USA<br>R1= 15<br>R2= 10 | Weighted<br>Average | Total<br>average |
|---------|-------------------------------|---------------------------|--|-------------------------------|--|-----------------------------|---------------------------------|---------------------------------|-----------------------------|-------------------------|---------------------|------------------|
| Parents |                               |                           |  |                               |  |                             |                                 |                                 |                             |                         |                     |                  |
| Round 1 | 59,09%                        | 64,29%                    |  | 33,33%                        |  | 50,00%                      | 61,11%                          | 50,00%                          | 54,55%                      | 80,00%                  | 56,55%              | 56,72%           |
| Round 2 | 41,18%                        | 57,14%                    |  | 23,08%                        |  | 50,00%                      | 41,18%                          | 61,54%                          | 42,86%                      | 80,00%                  | 49,62%              | 47,80%           |

|          | Australia<br>R1 = 18<br>R2 = 14 | Canada<br>R1 = 19<br>R2 = 17 | UK<br>R1 = 26<br>R2 = 20 | Finland<br>R1 = 19<br>R2 = 19 | France<br>R1 = 23<br>R2 = 18 | Malaysia<br>R1 = 34<br>R2= 34 | Netherlands<br>R1 = 24<br>R2 = 21 | Singapore<br>R1 = 32<br>R2 = 20 | Sweden<br>R1 = 19<br>R2 = 19 | USA<br>R1= 31<br>R2= 27 | Weighted<br>Average | Total<br>average |
|----------|---------------------------------|------------------------------|--------------------------|-------------------------------|------------------------------|-------------------------------|-----------------------------------|---------------------------------|------------------------------|-------------------------|---------------------|------------------|
| Surgeons |                                 |                              |                          |                               |                              |                               |                                   |                                 |                              |                         |                     |                  |
| Round 1  | 61,11%                          | 73,68%                       | 46,15%                   | 31,58%                        | 39,13%                       | 38,24%                        | 54,17%                            | 58,06%                          | 31,58%                       | 67,74%                  | 50,14%              | 50,41%           |
| Round 2  | 57,14%                          | 76,47%                       | 45,00%                   | 31,58%                        | 27,78%                       | 47,06%                        | 42,86%                            | 50,00%                          | 31,58%                       | 62,96%                  | 47,24%              | 47,40%           |

### Imaging

|          | Australia<br>R1= 23<br>R2= 17   | Canada<br>R1= 19<br>R2= 7    |                          | Finland<br>R1 = 13<br>R2 = 13 |                              | Malaysia<br>R1= 10<br>R2= 6   | Netherlands<br>R1= 20<br>R2= 17   | Singapore<br>R1 = 32<br>R2 = 13 | Sweden<br>R1 = 10<br>R2 = 8  | USA<br>R1= 15<br>R2= 10 | Weighted<br>Average | Total<br>average |
|----------|---------------------------------|------------------------------|--------------------------|-------------------------------|------------------------------|-------------------------------|-----------------------------------|---------------------------------|------------------------------|-------------------------|---------------------|------------------|
| Parents  |                                 |                              |                          |                               |                              |                               |                                   |                                 |                              |                         |                     |                  |
| Round 1  | 50,00%                          | 50,00%                       |                          | 41,67%                        |                              | 50,00%                        | 40,00%                            | 40,00%                          | 45,45%                       | 66,67%                  | 47,97%              | 47,33%           |
| Round 2  | 35,30%                          | 42,90%                       |                          | 16,70%                        |                              | 66,70%                        | 30,80%                            | 30,80%                          | 28,60%                       | 40,00%                  | 36,48%              | 34,10%           |
| Surgeons | Australia<br>R1 = 18<br>R2 = 14 | Canada<br>R1 = 19<br>R2 = 17 | UK<br>R1 = 26<br>R2 = 20 | Finland<br>R1 = 19<br>R2 = 19 | France<br>R1 = 23<br>R2 = 18 | Malaysia<br>R1 = 34<br>R2= 34 | Netherlands<br>R1 = 24<br>R2 = 21 | Singapore<br>R1 = 32<br>R2 = 20 | Sweden<br>R1 = 19<br>R2 = 19 | USA<br>R1= 31<br>R2= 27 | Weighted<br>Average | Total<br>average |
| Round 1  | 29,41%                          | 31,58%                       | 7,69%                    | 21,05%                        | 36,36%                       | 35,29%                        | 20,83%                            | 25,81%                          | 33,33%                       | 51,61%                  | 29,30%              | 29,88%           |
| Round 2  | 21,43%                          | 23,53%                       | 0,00%                    | 21,05%                        | 22,22%                       | 21,21%                        | 14,29%                            | 25,00%                          | 33,33%                       | 55,56%                  | 23,76%              | 24,80%           |

### Inflammation markers

|          | Australia<br>R1= 23<br>R2= 17   | Canada<br>R1= 19<br>R2= 7    |                          | Finland<br>R1 = 13<br>R2 = 13 |                              | Malaysia<br>R1= 10<br>R2= 6   | Netherlands<br>R1= 20<br>R2= 17   | Singapore<br>R1 = 32<br>R2 = 13 | Sweden<br>R1 = 10<br>R2 = 8  | USA<br>R1= 15<br>R2= 10 | Weighted<br>Average | Total<br>average |
|----------|---------------------------------|------------------------------|--------------------------|-------------------------------|------------------------------|-------------------------------|-----------------------------------|---------------------------------|------------------------------|-------------------------|---------------------|------------------|
| Parents  |                                 |                              |                          |                               |                              |                               |                                   |                                 |                              |                         |                     |                  |
| Round 1  | 66,67%                          | 78,57%                       |                          | 76,92%                        |                              | 45,45%                        | 68,75%                            | 61,29%                          | 61,54%                       | 53,33%                  | 64,07%              | 64,18%           |
| Round 2  | 68,80%                          | 57,10%                       |                          | 58,30%                        |                              | 66,70%                        | 70,60%                            | 61,50%                          | 62,50%                       | 55,60%                  | 62,64%              | 63,60%           |
| Surgeons | Australia<br>R1 = 18<br>R2 = 14 | Canada<br>R1 = 19<br>R2 = 17 | UK<br>R1 = 26<br>R2 = 20 | Finland<br>R1 = 19<br>R2 = 19 | France<br>R1 = 23<br>R2 = 18 | Malaysia<br>R1 = 34<br>R2= 34 | Netherlands<br>R1 = 24<br>R2 = 21 | Singapore<br>R1 = 32<br>R2 = 20 | Sweden<br>R1 = 19<br>R2 = 19 | USA<br>R1= 31<br>R2= 27 | Weighted<br>Average | Total<br>average |
| Round 1  | 17,65%                          | 10,53%                       | 3,85%                    | 26,32%                        | 17,39%                       | 14,71%                        | 25,00%                            | 31,25%                          | 15,79%                       | 6,67%                   | 16,91%              | 16,87%           |
| Round 2  | 15,40%                          | 0,00%                        | 0,00%                    | 26,30%                        | 5,60%                        | 14,70%                        | 19,00%                            | 20,00%                          | 26,30%                       | 7,40%                   | 13,47%              | 13,50%           |

### Intensive care admission

|          | Australia<br>R1= 23<br>R2= 17   | Canada<br>R1= 19<br>R2= 7    |                          | Finland<br>R1 = 13<br>R2 = 13 |                              | Malaysia<br>R1= 10<br>R2= 6   | Netherlands<br>R1= 20<br>R2= 17   | Singapore<br>R1 = 32<br>R2 = 13 | Sweden<br>R1 = 10<br>R2 = 8  | USA<br>R1= 15<br>R2= 10 | Weighted<br>Average | Total<br>average |
|----------|---------------------------------|------------------------------|--------------------------|-------------------------------|------------------------------|-------------------------------|-----------------------------------|---------------------------------|------------------------------|-------------------------|---------------------|------------------|
| Parents  |                                 |                              |                          |                               |                              |                               |                                   |                                 |                              |                         |                     |                  |
| Round 1  | NA                              | NA                           |                          | NA                            |                              | NA                            | NA                                | NA                              | NA                           | NA                      |                     |                  |
| Round 2  | 94,12%                          | 83,33%                       |                          | 76,92%                        |                              | 100,00%                       | 93,33%                            | 76,92%                          | 66,67%                       | 100,00%                 | 86,41%              | 87,20%           |
| Surgeons | Australia<br>R1 = 18<br>R2 = 14 | Canada<br>R1 = 19<br>R2 = 17 | UK<br>R1 = 26<br>R2 = 20 | Finland<br>R1 = 19<br>R2 = 19 | France<br>R1 = 23<br>R2 = 18 | Malaysia<br>R1 = 34<br>R2= 34 | Netherlands<br>R1 = 24<br>R2 = 21 | Singapore<br>R1 = 32<br>R2 = 20 | Sweden<br>R1 = 19<br>R2 = 19 | USA<br>R1= 31<br>R2= 27 | Weighted<br>Average | Total<br>average |
| Round 1  | NA                              | NA                           | NA                       | NA                            | NA                           | NA                            | NA                                | NA                              | NA                           | NA                      |                     |                  |
| Round 2  | 85,71%                          | 52,94%                       | 70,00%                   | 83,33%                        | 64,71%                       | 63,64%                        | 66,67%                            | 73,68%                          | 72,22%                       | 44,44%                  | 67,73%              | 66,20%           |





### Need for re-operation

|          | Australia<br>R1= 23<br>R2= 17   | Canada<br>R1= 19<br>R2= 7    | Finland<br>R1 = 13<br>R2 = 13 | Malaysia<br>R1= 10<br>R2= 6   | Netherlands<br>R1= 20<br>R2= 17 | Singapore<br>R1 = 32<br>R2 = 13 | Sweden<br>R1 = 10<br>R2 = 8       | USA<br>R1= 15<br>R2= 10         | Weighted<br>Average          | Total<br>average        |                     |                  |
|----------|---------------------------------|------------------------------|-------------------------------|-------------------------------|---------------------------------|---------------------------------|-----------------------------------|---------------------------------|------------------------------|-------------------------|---------------------|------------------|
| Parents  |                                 |                              |                               |                               |                                 |                                 |                                   |                                 |                              |                         |                     |                  |
| Round 1  | 90,91%                          | 100,00%                      | 83,33%                        | 75,00%                        | 83,33%                          | 72,41%                          | 81,82%                            | 93,33%                          | 85,02%                       | 84,20%                  |                     |                  |
| Round 2  | NA                              | NA                           | NA                            | NA                            | NA                              | NA                              | NA                                | NA                              | NA                           | NA                      |                     |                  |
|          | Australia<br>R1 = 18<br>R2 = 14 | Canada<br>R1 = 19<br>R2 = 17 | UK<br>R1 = 26<br>R2 = 20      | Finland<br>R1 = 19<br>R2 = 19 | France<br>R1 = 23<br>R2 = 18    | Malaysia<br>R1 = 34<br>R2 = 34  | Netherlands<br>R1 = 24<br>R2 = 21 | Singapore<br>R1 = 32<br>R2 = 20 | Sweden<br>R1 = 19<br>R2 = 19 | USA<br>R1= 31<br>R2= 27 | Weighted<br>Average | Total<br>average |
| Surgeons |                                 |                              |                               |                               |                                 |                                 |                                   |                                 |                              |                         |                     |                  |
| Round 1  | 88,89%                          | 94,74%                       | 88,46%                        | 100,00%                       | 82,61%                          | 88,24%                          | 91,67%                            | 93,55%                          | 94,74%                       | 96,77%                  | 91,97%              | 91,80%           |
| Round 2  | NA                              | NA                           | NA                            | NA                            | NA                              | NA                              | NA                                | NA                              | NA                           | NA                      | NA                  | NA               |

### Need for appendectomy

|          | Australia<br>R1= 23<br>R2= 17   | Canada<br>R1= 19<br>R2= 7    | Finland<br>R1 = 13<br>R2 = 13 | Malaysia<br>R1= 10<br>R2= 6   | Netherlands<br>R1= 20<br>R2= 17 | Singapore<br>R1 = 32<br>R2 = 13 | Sweden<br>R1 = 10<br>R2 = 8       | USA<br>R1= 15<br>R2= 10         | Weighted<br>Average          | Total<br>average        |                     |                  |
|----------|---------------------------------|------------------------------|-------------------------------|-------------------------------|---------------------------------|---------------------------------|-----------------------------------|---------------------------------|------------------------------|-------------------------|---------------------|------------------|
| Parents  |                                 |                              |                               |                               |                                 |                                 |                                   |                                 |                              |                         |                     |                  |
| Round 1  | 81,82%                          | 100,00%                      | 100,00%                       | 75,00%                        | 73,68%                          | 67,86%                          | 80,00%                            | 73,33%                          | 81,46%                       | 79,55%                  |                     |                  |
| Round 2  | 94,12%                          | 85,71%                       | 100,00%                       | 100,00%                       | 88,24%                          | 92,31%                          | 100,00%                           | 80,00%                          | 92,55%                       | 92,20%                  |                     |                  |
|          | Australia<br>R1 = 18<br>R2 = 14 | Canada<br>R1 = 19<br>R2 = 17 | UK<br>R1 = 26<br>R2 = 20      | Finland<br>R1 = 19<br>R2 = 19 | France<br>R1 = 23<br>R2 = 18    | Malaysia<br>R1 = 34<br>R2 = 34  | Netherlands<br>R1 = 24<br>R2 = 21 | Singapore<br>R1 = 32<br>R2 = 20 | Sweden<br>R1 = 19<br>R2 = 19 | USA<br>R1= 31<br>R2= 27 | Weighted<br>Average | Total<br>average |
| Surgeons |                                 |                              |                               |                               |                                 |                                 |                                   |                                 |                              |                         |                     |                  |
| Round 1  | 64,71%                          | 73,68%                       | 53,85%                        | 55,56%                        | 59,09%                          | 52,94%                          | 69,57%                            | 51,72%                          | 42,11%                       | 79,31%                  | 60,25%              | 60,17%           |
| Round 2  | 61,54%                          | 82,35%                       | 60,00%                        | 72,22%                        | 58,82%                          | 57,58%                          | 75,00%                            | 70,00%                          | 63,16%                       | 88,89%                  | 68,96%              | 69,10%           |

### Duration abdominal drainage

|          | Australia<br>R1= 23<br>R2= 17   | Canada<br>R1= 19<br>R2= 7    | Finland<br>R1 = 13<br>R2 = 13 | Malaysia<br>R1= 10<br>R2= 6   | Netherlands<br>R1= 20<br>R2= 17 | Singapore<br>R1 = 32<br>R2 = 13 | Sweden<br>R1 = 10<br>R2 = 8       | USA<br>R1= 15<br>R2= 10         | Weighted<br>Average          | Total<br>average        |                     |                  |
|----------|---------------------------------|------------------------------|-------------------------------|-------------------------------|---------------------------------|---------------------------------|-----------------------------------|---------------------------------|------------------------------|-------------------------|---------------------|------------------|
| Parents  |                                 |                              |                               |                               |                                 |                                 |                                   |                                 |                              |                         |                     |                  |
| Round 1  | 52,94%                          | 38,46%                       | 55,56%                        | 33,33%                        | 63,64%                          | 50,00%                          | 58,33%                            | 68,75%                          | 52,63%                       | 52,94%                  |                     |                  |
| Round 2  | 66,67%                          | 33,33%                       | 46,15%                        | 100,00%                       | 53,33%                          | 50,00%                          | 57,14%                            | 70,00%                          | 59,58%                       | 57,80%                  |                     |                  |
|          | Australia<br>R1 = 18<br>R2 = 14 | Canada<br>R1 = 19<br>R2 = 17 | UK<br>R1 = 26<br>R2 = 20      | Finland<br>R1 = 19<br>R2 = 19 | France<br>R1 = 23<br>R2 = 18    | Malaysia<br>R1 = 34<br>R2 = 34  | Netherlands<br>R1 = 24<br>R2 = 21 | Singapore<br>R1 = 32<br>R2 = 20 | Sweden<br>R1 = 19<br>R2 = 19 | USA<br>R1= 31<br>R2= 27 | Weighted<br>Average | Total<br>average |
| Surgeons |                                 |                              |                               |                               |                                 |                                 |                                   |                                 |                              |                         |                     |                  |
| Round 1  | 33,33%                          | 44,44%                       | 30,77%                        | 52,63%                        | 33,33%                          | 32,26%                          | 33,33%                            | 55,17%                          | 16,67%                       | 31,03%                  | 36,30%              | 36,48%           |
| Round 2  | 35,71%                          | 47,06%                       | 50,00%                        | 63,16%                        | 27,78%                          | 54,55%                          | 42,86%                            | 57,89%                          | 26,32%                       | 48,15%                  | 45,35%              | 46,40%           |

### Hospital re-admission

|         | Australia<br>R1= 23<br>R2= 17 | Canada<br>R1= 19<br>R2= 7 | Finland<br>R1 = 13<br>R2 = 13 | Malaysia<br>R1= 10<br>R2= 6 | Netherlands<br>R1= 20<br>R2= 17 | Singapore<br>R1 = 32<br>R2 = 13 | Sweden<br>R1 = 10<br>R2 = 8 | USA<br>R1= 15<br>R2= 10 | Weighted<br>Average | Total<br>average |
|---------|-------------------------------|---------------------------|-------------------------------|-----------------------------|---------------------------------|---------------------------------|-----------------------------|-------------------------|---------------------|------------------|
| Parents |                               |                           |                               |                             |                                 |                                 |                             |                         |                     |                  |
| Round 1 | 81,82%                        | 92,86%                    | 50,00%                        | 66,67%                      | 94,12%                          | 60,00%                          | 63,64%                      | 80,00%                  | 73,64%              | 73,70%           |
| Round 2 | NA                            | NA                        | NA                            | NA                          | NA                              | NA                              | NA                          | NA                      | NA                  | NA               |

|          | Australia<br>R1 = 18<br>R2 = 14 | Canada<br>R1 = 19<br>R2 = 17 | UK<br>R1 = 26<br>R2 = 20 | Finland<br>R1 = 19<br>R2 = 19 | France<br>R1 = 23<br>R2 = 18 | Malaysia<br>R1 = 34<br>R2= 34 | Netherlands<br>R1 = 24<br>R2 = 21 | Singapore<br>R1 = 32<br>R2 = 20 | Sweden<br>R1 = 19<br>R2 = 19 | USA<br>R1= 31<br>R2= 27 | Weighted<br>Average | Total<br>average |
|----------|---------------------------------|------------------------------|--------------------------|-------------------------------|------------------------------|-------------------------------|-----------------------------------|---------------------------------|------------------------------|-------------------------|---------------------|------------------|
| Surgeons |                                 |                              |                          |                               |                              |                               |                                   |                                 |                              |                         |                     |                  |
| Round 1  | 83,33%                          | 94,74%                       | 76,92%                   | 63,16%                        | 82,61%                       | 76,47%                        | 83,33%                            | 80,65%                          | 57,89%                       | 83,87%                  | 78,30%              | 78,70%           |
| Round 2  | NA                              | NA                           | NA                       | NA                            | NA                           | NA                            | NA                                | NA                              | NA                           | NA                      | NA                  | NA               |

### Non-infectious wound complications

|         | Australia<br>R1= 23<br>R2= 17 | Canada<br>R1= 19<br>R2= 7 | Finland<br>R1 = 13<br>R2 = 13 | Malaysia<br>R1= 10<br>R2= 6 | Netherlands<br>R1= 20<br>R2= 17 | Singapore<br>R1 = 32<br>R2 = 13 | Sweden<br>R1 = 10<br>R2 = 8 | USA<br>R1= 15<br>R2= 10 | Weighted<br>Average | Total<br>average |
|---------|-------------------------------|---------------------------|-------------------------------|-----------------------------|---------------------------------|---------------------------------|-----------------------------|-------------------------|---------------------|------------------|
| Parents |                               |                           |                               |                             |                                 |                                 |                             |                         |                     |                  |
| Round 1 | 40,90%                        | 46,70%                    | 33,30%                        | 45,50%                      | 80,00%                          | 48,40%                          | 61,50%                      | 55,60%                  | 51,49%              | 51,10%           |
| Round 2 | 29,40%                        | 28,60%                    | 16,70%                        | 50,00%                      | 56,30%                          | 30,80%                          | 50,00%                      | 50,00%                  | 38,98%              | 38,20%           |

|          | Australia<br>R1 = 18<br>R2 = 14 | Canada<br>R1 = 19<br>R2 = 17 | UK<br>R1 = 26<br>R2 = 20 | Finland<br>R1 = 19<br>R2 = 19 | France<br>R1 = 23<br>R2 = 18 | Malaysia<br>R1 = 34<br>R2= 34 | Netherlands<br>R1 = 24<br>R2 = 21 | Singapore<br>R1 = 32<br>R2 = 20 | Sweden<br>R1 = 19<br>R2 = 19 | USA<br>R1= 31<br>R2= 27 | Weighted<br>Average | Total<br>average |
|----------|---------------------------------|------------------------------|--------------------------|-------------------------------|------------------------------|-------------------------------|-----------------------------------|---------------------------------|------------------------------|-------------------------|---------------------|------------------|
| Surgeons |                                 |                              |                          |                               |                              |                               |                                   |                                 |                              |                         |                     |                  |
| Round 1  | 33,33%                          | 26,32%                       | 30,77%                   | 26,32%                        | 43,48%                       | 29,41%                        | 45,83%                            | 37,50%                          | 26,32%                       | 48,39%                  | 34,77%              | 35,51%           |
| Round 2  | 28,57%                          | 29,41%                       | 30,00%                   | 26,32%                        | 38,89%                       | 29,41%                        | 23,81%                            | 30,00%                          | 21,05%                       | 29,63%                  | 28,71%              | 28,70%           |

### Other infectious complications

|         | Australia<br>R1= 23<br>R2= 17 | Canada<br>R1= 19<br>R2= 7 | Finland<br>R1 = 13<br>R2 = 13 | Malaysia<br>R1= 10<br>R2= 6 | Netherlands<br>R1= 20<br>R2= 17 | Singapore<br>R1 = 32<br>R2 = 13 | Sweden<br>R1 = 10<br>R2 = 8 | USA<br>R1= 15<br>R2= 10 | Weighted<br>Average | Total<br>average |
|---------|-------------------------------|---------------------------|-------------------------------|-----------------------------|---------------------------------|---------------------------------|-----------------------------|-------------------------|---------------------|------------------|
| Parents |                               |                           |                               |                             |                                 |                                 |                             |                         |                     |                  |
| Round 1 | 86,36%                        | 66,67%                    | 61,54%                        | 50,00%                      | 75,00%                          | 61,29%                          | 61,54%                      | 77,78%                  | 67,52%              | 68,57%           |
| Round 2 | 70,60%                        | 57,10%                    | 58,30%                        | 50,00%                      | 56,30%                          | 76,90%                          | 62,50%                      | 70,00%                  | 62,71%              | 64,00%           |

|          | Australia<br>R1 = 18<br>R2 = 14 | Canada<br>R1 = 19<br>R2 = 17 | UK<br>R1 = 26<br>R2 = 20 | Finland<br>R1 = 19<br>R2 = 19 | France<br>R1 = 23<br>R2 = 18 | Malaysia<br>R1 = 34<br>R2= 34 | Netherlands<br>R1 = 24<br>R2 = 21 | Singapore<br>R1 = 32<br>R2 = 20 | Sweden<br>R1 = 19<br>R2 = 19 | USA<br>R1= 31<br>R2= 27 | Weighted<br>Average | Total<br>average |
|----------|---------------------------------|------------------------------|--------------------------|-------------------------------|------------------------------|-------------------------------|-----------------------------------|---------------------------------|------------------------------|-------------------------|---------------------|------------------|
| Surgeons |                                 |                              |                          |                               |                              |                               |                                   |                                 |                              |                         |                     |                  |
| Round 1  | 11,76%                          | 31,58%                       | 23,08%                   | 44,44%                        | 34,78%                       | 26,47%                        | 29,17%                            | 37,50%                          | 31,58%                       | 51,61%                  | 32,20%              | 32,92%           |
| Round 2  | 14,29%                          | 35,29%                       | 20,00%                   | 33,33%                        | 38,89%                       | 17,65%                        | 19,05%                            | 30,00%                          | 21,05%                       | 48,15%                  | 27,77%              | 27,90%           |

## Pain score

|          | Australia<br>R1= 23<br>R2= 17   | Canada<br>R1= 19<br>R2= 7    |                          | Finland<br>R1= 13<br>R2= 13   |                              | Malaysia<br>R1= 10<br>R2= 6   | Netherlands<br>R1= 20<br>R2= 17   | Singapore<br>R1= 32<br>R2= 13   | Sweden<br>R1= 10<br>R2= 8    | USA<br>R1= 15<br>R2= 10 | Weighted<br>Average | Total<br>average |
|----------|---------------------------------|------------------------------|--------------------------|-------------------------------|------------------------------|-------------------------------|-----------------------------------|---------------------------------|------------------------------|-------------------------|---------------------|------------------|
| Parents  |                                 |                              |                          |                               |                              |                               |                                   |                                 |                              |                         |                     |                  |
| Round 1  | 59,09%                          | 78,57%                       |                          | 46,15%                        |                              | 66,67%                        | 73,68%                            | 60,00%                          | 66,67%                       | 73,33%                  | 65,52%              | 64,96%           |
| Round 2  | 58,80%                          | 85,70%                       |                          | 38,50%                        |                              | 83,30%                        | 52,90%                            | 76,90%                          | 85,70%                       | 80,00%                  | 70,23%              | 65,60%           |
| Surgeons | Australia<br>R1 = 18<br>R2 = 14 | Canada<br>R1 = 19<br>R2 = 17 | UK<br>R1 = 26<br>R2 = 20 | Finland<br>R1 = 19<br>R2 = 19 | France<br>R1 = 23<br>R2 = 18 | Malaysia<br>R1 = 34<br>R2= 34 | Netherlands<br>R1 = 24<br>R2 = 21 | Singapore<br>R1 = 32<br>R2 = 20 | Sweden<br>R1 = 19<br>R2 = 19 | USA<br>R1= 31<br>R2= 27 | Weighted<br>Average | Total<br>average |
| Round 1  | 27,80%                          | 42,10%                       | 30,80%                   | 36,80%                        | 56,50%                       | 58,80%                        | 45,80%                            | 38,70%                          | 36,80%                       | 48,40%                  | 42,25%              | 43,40%           |
| Round 2  | 35,71%                          | 58,82%                       | 40,00%                   | 31,58%                        | 72,22%                       | 64,71%                        | 57,14%                            | 50,00%                          | 26,32%                       | 44,44%                  | 48,09%              | 49,30%           |

## Parent days off work

|          | Australia<br>R1= 23<br>R2= 17   | Canada<br>R1= 19<br>R2= 7    |                          | Finland<br>R1 = 13<br>R2 = 13 |                              | Malaysia<br>R1= 10<br>R2= 6   | Netherlands<br>R1= 20<br>R2= 17   | Singapore<br>R1 = 32<br>R2 = 13 | Sweden<br>R1 = 10<br>R2 = 8  | USA<br>R1= 15<br>R2= 10 | Weighted<br>Average | Total<br>average |
|----------|---------------------------------|------------------------------|--------------------------|-------------------------------|------------------------------|-------------------------------|-----------------------------------|---------------------------------|------------------------------|-------------------------|---------------------|------------------|
| Parents  |                                 |                              |                          |                               |                              |                               |                                   |                                 |                              |                         |                     |                  |
| Round 1  | 13,60%                          | 35,70%                       |                          | 33,30%                        |                              | 50,00%                        | 31,60%                            | 36,70%                          | 15,40%                       | 53,30%                  | 33,70%              | 32,80%           |
| Round 2  | 5,90%                           | 42,90%                       |                          | 7,70%                         |                              | 66,70%                        | 11,80%                            | 30,80%                          | 14,30%                       | 20,00%                  | 25,01%              | 20,00%           |
| Surgeons | Australia<br>R1 = 18<br>R2 = 14 | Canada<br>R1 = 19<br>R2 = 17 | UK<br>R1 = 26<br>R2 = 20 | Finland<br>R1 = 19<br>R2 = 19 | France<br>R1 = 23<br>R2 = 18 | Malaysia<br>R1 = 34<br>R2= 34 | Netherlands<br>R1 = 24<br>R2 = 21 | Singapore<br>R1 = 32<br>R2 = 20 | Sweden<br>R1 = 19<br>R2 = 19 | USA<br>R1= 31<br>R2= 27 | Weighted<br>Average | Total<br>average |
| Round 1  | 23,53%                          | 57,89%                       | 19,23%                   | 31,58%                        | 21,74%                       | 11,76%                        | 29,17%                            | 32,26%                          | 10,53%                       | 48,39%                  | 28,61%              | 28,40%           |
| Round 2  | 15,38%                          | 41,18%                       | 10,00%                   | 21,05%                        | 16,67%                       | 15,15%                        | 9,52%                             | 15,00%                          | 10,53%                       | 44,44%                  | 19,89%              | 20,30%           |

## Parental quality of life

|          | Australia<br>R1= 23<br>R2= 17   | Canada<br>R1= 19<br>R2= 7    |                          | Finland<br>R1 = 13<br>R2 = 13 |                              | Malaysia<br>R1= 10<br>R2= 6   | Netherlands<br>R1= 20<br>R2= 17   | Singapore<br>R1 = 32<br>R2 = 13 | Sweden<br>R1 = 10<br>R2 = 8  | USA<br>R1= 15<br>R2= 10 | Weighted<br>Average | Total<br>average |
|----------|---------------------------------|------------------------------|--------------------------|-------------------------------|------------------------------|-------------------------------|-----------------------------------|---------------------------------|------------------------------|-------------------------|---------------------|------------------|
| Parents  |                                 |                              |                          |                               |                              |                               |                                   |                                 |                              |                         |                     |                  |
| Round 1  | 9,09%                           | 14,29%                       |                          | 7,69%                         |                              | 41,67%                        | 26,32%                            | 43,33%                          | 18,18%                       | 40,00%                  | 25,07%              | 26,47%           |
| Round 2  | 11,76%                          | 28,57%                       |                          | 7,69%                         |                              | 66,67%                        | 17,65%                            | 38,46%                          | 0,00%                        | 30,00%                  | 25,10%              | 22,00%           |
| Surgeons | Australia<br>R1 = 18<br>R2 = 14 | Canada<br>R1 = 19<br>R2 = 17 | UK<br>R1 = 26<br>R2 = 20 | Finland<br>R1 = 19<br>R2 = 19 | France<br>R1 = 23<br>R2 = 18 | Malaysia<br>R1 = 34<br>R2= 34 | Netherlands<br>R1 = 24<br>R2 = 21 | Singapore<br>R1 = 32<br>R2 = 20 | Sweden<br>R1 = 19<br>R2 = 19 | USA<br>R1= 31<br>R2= 27 | Weighted<br>Average | Total<br>average |
| Round 1  | 23,53%                          | 63,16%                       | 32,00%                   | 10,53%                        | 30,43%                       | 50,00%                        | 50,00%                            | 35,48%                          | 21,05%                       | 66,67%                  | 38,29%              | 40,25%           |
| Round 2  | 30,77%                          | 58,82%                       | 31,58%                   | 11,11%                        | 27,78%                       | 47,06%                        | 38,10%                            | 40,00%                          | 26,32%                       | 51,85%                  | 36,34%              | 37,90%           |

### Patient and/or parent satisfaction

|         | Australia<br>R1= 23<br>R2= 17 | Canada<br>R1= 19<br>R2= 7 |  | Finland<br>R1 = 13<br>R2 = 13 |  | Malaysia<br>R1= 10<br>R2= 6 | Netherlands<br>R1= 20<br>R2= 17 | Singapore<br>R1 = 32<br>R2 = 13 | Sweden<br>R1 = 10<br>R2 = 8 | USA<br>R1= 15<br>R2= 10 | Weighted<br>Average | Total<br>average |
|---------|-------------------------------|---------------------------|--|-------------------------------|--|-----------------------------|---------------------------------|---------------------------------|-----------------------------|-------------------------|---------------------|------------------|
| Parents |                               |                           |  |                               |  |                             |                                 |                                 |                             |                         |                     |                  |
| Round 1 | 40,91%                        | 42,86%                    |  | 46,15%                        |  | 72,73%                      | 57,89%                          | 50,00%                          | 46,15%                      | 73,33%                  | 53,75%              | 52,55%           |
| Round 2 | 52,90%                        | 42,90%                    |  | 30,80%                        |  | 80,00%                      | 52,90%                          | 53,80%                          | 37,50%                      | 60,00%                  | 51,35%              | 50,00%           |

|          | Australia<br>R1 = 18<br>R2 = 14 | Canada<br>R1 = 19<br>R2 = 17 | UK<br>R1 = 26<br>R2 = 20 | Finland<br>R1 = 19<br>R2 = 19 | France<br>R1 = 23<br>R2 = 18 | Malaysia<br>R1 = 34<br>R2= 34 | Netherlands<br>R1 = 24<br>R2 = 21 | Singapore<br>R1 = 32<br>R2 = 20 | Sweden<br>R1 = 19<br>R2 = 19 | USA<br>R1= 31<br>R2= 27 | Weighted<br>Average | Total<br>average |
|----------|---------------------------------|------------------------------|--------------------------|-------------------------------|------------------------------|-------------------------------|-----------------------------------|---------------------------------|------------------------------|-------------------------|---------------------|------------------|
| Surgeons |                                 |                              |                          |                               |                              |                               |                                   |                                 |                              |                         |                     |                  |
| Round 1  | 38,89%                          | 78,95%                       | 42,31%                   | 26,32%                        | 34,78%                       | 64,71%                        | 66,67%                            | 41,94%                          | 42,11%                       | 61,29%                  | 49,79%              | 50,82%           |
| Round 2  | 35,71%                          | 94,12%                       | 50,00%                   | 31,58%                        | 27,78%                       | 70,59%                        | 76,19%                            | 40,00%                          | 47,37%                       | 70,37%                  | 54,37%              | 56,50%           |

### Pediatric Quality of Life

|         | Australia<br>R1= 23<br>R2= 17 | Canada<br>R1= 19<br>R2= 7 |  | Finland<br>R1 = 13<br>R2 = 13 |  | Malaysia<br>R1= 10<br>R2= 6 | Netherlands<br>R1= 20<br>R2= 17 | Singapore<br>R1 = 32<br>R2 = 13 | Sweden<br>R1 = 10<br>R2 = 8 | USA<br>R1= 15<br>R2= 10 | Weighted<br>Average | Total<br>average |
|---------|-------------------------------|---------------------------|--|-------------------------------|--|-----------------------------|---------------------------------|---------------------------------|-----------------------------|-------------------------|---------------------|------------------|
| Parents |                               |                           |  |                               |  |                             |                                 |                                 |                             |                         |                     |                  |
| Round 1 | 45,45%                        | 64,29%                    |  | 61,54%                        |  | 58,33%                      | 78,95%                          | 60,00%                          | 61,54%                      | 73,33%                  | 62,93%              | 62,32%           |
| Round 2 | 64,71%                        | 42,86%                    |  | 53,85%                        |  | 83,33%                      | 70,59%                          | 61,54%                          | 75,00%                      | 90,00%                  | 67,73%              | 67,00%           |

|          | Australia<br>R1 = 18<br>R2 = 14 | Canada<br>R1 = 19<br>R2 = 17 | UK<br>R1 = 26<br>R2 = 20 | Finland<br>R1 = 19<br>R2 = 19 | France<br>R1 = 23<br>R2 = 18 | Malaysia<br>R1 = 34<br>R2= 34 | Netherlands<br>R1 = 24<br>R2 = 21 | Singapore<br>R1 = 32<br>R2 = 20 | Sweden<br>R1 = 19<br>R2 = 19 | USA<br>R1= 31<br>R2= 27 | Weighted<br>Average | Total<br>average |
|----------|---------------------------------|------------------------------|--------------------------|-------------------------------|------------------------------|-------------------------------|-----------------------------------|---------------------------------|------------------------------|-------------------------|---------------------|------------------|
| Surgeons |                                 |                              |                          |                               |                              |                               |                                   |                                 |                              |                         |                     |                  |
| Round 1  | 35,29%                          | 57,89%                       | 48,00%                   | 26,32%                        | 47,83%                       | 52,94%                        | 75,00%                            | 41,94%                          | 42,11%                       | 66,67%                  | 49,40%              | 50,62%           |
| Round 2  | 41,67%                          | 82,35%                       | 57,89%                   | 36,84%                        | 50,00%                       | 47,06%                        | 76,19%                            | 40,00%                          | 52,63%                       | 70,37%                  | 55,50%              | 55,80%           |

### Recovery to full activity/sport

|         | Australia<br>R1= 23<br>R2= 17 | Canada<br>R1= 19<br>R2= 7 |  | Finland<br>R1 = 13<br>R2 = 13 |  | Malaysia<br>R1= 10<br>R2= 6 | Netherlands<br>R1= 20<br>R2= 17 | Singapore<br>R1 = 32<br>R2 = 13 | Sweden<br>R1 = 10<br>R2 = 8 | USA<br>R1= 15<br>R2= 10 | Weighted<br>Average | Total<br>average |
|---------|-------------------------------|---------------------------|--|-------------------------------|--|-----------------------------|---------------------------------|---------------------------------|-----------------------------|-------------------------|---------------------|------------------|
| Parents |                               |                           |  |                               |  |                             |                                 |                                 |                             |                         |                     |                  |
| Round 1 | 45,45%                        | 57,14%                    |  | 38,46%                        |  | 75,00%                      | 63,16%                          | 53,33%                          | 46,15%                      | 73,33%                  | 56,50%              | 55,80%           |
| Round 2 | 35,30%                        | 57,10%                    |  | 15,40%                        |  | 100,00%                     | 29,40%                          | 53,80%                          | 37,50%                      | 70,00%                  | 49,81%              | 44,00%           |

|          | Australia<br>R1 = 18<br>R2 = 14 | Canada<br>R1 = 19<br>R2 = 17 | UK<br>R1 = 26<br>R2 = 20 | Finland<br>R1 = 19<br>R2 = 19 | France<br>R1 = 23<br>R2 = 18 | Malaysia<br>R1 = 34<br>R2= 34 | Netherlands<br>R1 = 24<br>R2 = 21 | Singapore<br>R1 = 32<br>R2 = 20 | Sweden<br>R1 = 19<br>R2 = 19 | USA<br>R1= 31<br>R2= 27 | Weighted<br>Average | Total<br>average |
|----------|---------------------------------|------------------------------|--------------------------|-------------------------------|------------------------------|-------------------------------|-----------------------------------|---------------------------------|------------------------------|-------------------------|---------------------|------------------|
| Surgeons |                                 |                              |                          |                               |                              |                               |                                   |                                 |                              |                         |                     |                  |
| Round 1  | 11,11%                          | 57,89%                       | 23,08%                   | 36,84%                        | 43,48%                       | 52,94%                        | 54,17%                            | 38,71%                          | 36,84%                       | 67,74%                  | 42,28%              | 43,85%           |
| Round 2  | 21,43%                          | 52,94%                       | 30,00%                   | 26,32%                        | 33,33%                       | 47,06%                        | 42,86%                            | 40,00%                          | 36,84%                       | 77,78%                  | 40,86%              | 43,10%           |

### Recovery gastrointestinal function

|          | Australia<br>R1= 23<br>R2= 17   | Canada<br>R1= 19<br>R2= 7    |                          | Finland<br>R1 = 13<br>R2 = 13 |                              | Malaysia<br>R1= 10<br>R2= 6   | Netherlands<br>R1= 20<br>R2= 17   | Singapore<br>R1 = 32<br>R2 = 13 | Sweden<br>R1 = 10<br>R2 = 8  | USA<br>R1= 15<br>R2= 10 | Weighted<br>Average | Total<br>average |
|----------|---------------------------------|------------------------------|--------------------------|-------------------------------|------------------------------|-------------------------------|-----------------------------------|---------------------------------|------------------------------|-------------------------|---------------------|------------------|
| Parents  |                                 |                              |                          |                               |                              |                               |                                   |                                 |                              |                         |                     |                  |
| Round 1  | 57,14%                          | 71,43%                       |                          | 69,23%                        |                              | 66,67%                        | 57,14%                            | 46,88%                          | 46,15%                       | 64,71%                  | 59,92%              | 58,09%           |
| Round 2  | 70,60%                          | 42,90%                       |                          | 23,10%                        |                              | 83,30%                        | 31,30%                            | 53,80%                          | 62,50%                       | 70,00%                  | 54,69%              | 52,80%           |
|          | Australia<br>R1 = 18<br>R2 = 14 | Canada<br>R1 = 19<br>R2 = 17 | UK<br>R1 = 26<br>R2 = 20 | Finland<br>R1 = 19<br>R2 = 19 | France<br>R1 = 23<br>R2 = 18 | Malaysia<br>R1 = 34<br>R2= 34 | Netherlands<br>R1 = 24<br>R2 = 21 | Singapore<br>R1 = 32<br>R2 = 20 | Sweden<br>R1 = 19<br>R2 = 19 | USA<br>R1= 31<br>R2= 27 | Weighted<br>Average | Total<br>average |
| Surgeons |                                 |                              |                          |                               |                              |                               |                                   |                                 |                              |                         |                     |                  |
| Round 1  | 22,22%                          | 52,63%                       | 50,00%                   | 57,89%                        | 39,13%                       | 50,00%                        | 33,33%                            | 50,00%                          | 42,11%                       | 48,39%                  | 44,57%              | 45,31%           |
| Round 2  | 35,71%                          | 58,82%                       | 50,00%                   | 57,89%                        | 55,56%                       | 55,88%                        | 42,86%                            | 65,00%                          | 47,37%                       | 51,85%                  | 52,09%              | 52,60%           |

### Recurrent appendicitis

|          | Australia<br>R1= 23<br>R2= 17   | Canada<br>R1= 19<br>R2= 7    |                          | Finland<br>R1 = 13<br>R2 = 13 |                              | Malaysia<br>R1= 10<br>R2= 6   | Netherlands<br>R1= 20<br>R2= 17   | Singapore<br>R1 = 32<br>R2 = 13 | Sweden<br>R1 = 10<br>R2 = 8  | USA<br>R1= 15<br>R2= 10 | Weighted<br>Average | Total<br>average |
|----------|---------------------------------|------------------------------|--------------------------|-------------------------------|------------------------------|-------------------------------|-----------------------------------|---------------------------------|------------------------------|-------------------------|---------------------|------------------|
| Parents  |                                 |                              |                          |                               |                              |                               |                                   |                                 |                              |                         |                     |                  |
| Round 1  | 77,27%                          | 86,67%                       |                          | 76,92%                        |                              | 60,00%                        | 100,00%                           | 61,29%                          | 83,33%                       | 100,00%                 | 80,69%              | 79,40%           |
| Round 2  | NA                              | NA                           |                          | NA                            |                              | NA                            | NA                                | NA                              | NA                           | NA                      | NA                  | NA               |
|          | Australia<br>R1 = 18<br>R2 = 14 | Canada<br>R1 = 19<br>R2 = 17 | UK<br>R1 = 26<br>R2 = 20 | Finland<br>R1 = 19<br>R2 = 19 | France<br>R1 = 23<br>R2 = 18 | Malaysia<br>R1 = 34<br>R2= 34 | Netherlands<br>R1 = 24<br>R2 = 21 | Singapore<br>R1 = 32<br>R2 = 20 | Sweden<br>R1 = 19<br>R2 = 19 | USA<br>R1= 31<br>R2= 27 | Weighted<br>Average | Total<br>average |
| Surgeons |                                 |                              |                          |                               |                              |                               |                                   |                                 |                              |                         |                     |                  |
| Round 1  | 66,67%                          | 89,47%                       | 76,92%                   | 77,78%                        | 61,90%                       | 63,64%                        | 83,33%                            | 70,97%                          | 57,89%                       | 80,65%                  | 72,92%              | 72,90%           |
| Round 2  | NA                              | NA                           | NA                       | NA                            | NA                           | NA                            | NA                                | NA                              | NA                           | NA                      | NA                  | NA               |

### Significant fever after treatment

|          | Australia<br>R1= 23<br>R2= 17   | Canada<br>R1= 19<br>R2= 7    |                          | Finland<br>R1 = 13<br>R2 = 13 |                              | Malaysia<br>R1= 10<br>R2= 6   | Netherlands<br>R1= 20<br>R2= 17   | Singapore<br>R1 = 32<br>R2 = 13 | Sweden<br>R1 = 10<br>R2 = 8  | USA<br>R1= 15<br>R2= 10 | Weighted<br>Average | Total<br>average |
|----------|---------------------------------|------------------------------|--------------------------|-------------------------------|------------------------------|-------------------------------|-----------------------------------|---------------------------------|------------------------------|-------------------------|---------------------|------------------|
| Parents  |                                 |                              |                          |                               |                              |                               |                                   |                                 |                              |                         |                     |                  |
| Round 1  | 85,71%                          | 86,67%                       |                          | 76,92%                        |                              | 75,00%                        | 86,67%                            | 62,50%                          | 76,92%                       | 94,44%                  | 80,60%              | 79,14%           |
| Round 2  | 94,10%                          | 71,40%                       |                          | 84,60%                        |                              | 83,30%                        | 75,00%                            | 92,30%                          | 75,00%                       | 90,00%                  | 83,21%              | 84,40%           |
|          | Australia<br>R1 = 18<br>R2 = 14 | Canada<br>R1 = 19<br>R2 = 17 | UK<br>R1 = 26<br>R2 = 20 | Finland<br>R1 = 19<br>R2 = 19 | France<br>R1 = 23<br>R2 = 18 | Malaysia<br>R1 = 34<br>R2= 34 | Netherlands<br>R1 = 24<br>R2 = 21 | Singapore<br>R1 = 32<br>R2 = 20 | Sweden<br>R1 = 19<br>R2 = 19 | USA<br>R1= 31<br>R2= 27 | Weighted<br>Average | Total<br>average |
| Surgeons |                                 |                              |                          |                               |                              |                               |                                   |                                 |                              |                         |                     |                  |
| Round 1  | 27,78%                          | 42,11%                       | 34,62%                   | 57,89%                        | 52,17%                       | 55,88%                        | 37,50%                            | 43,75%                          | 47,37%                       | 29,03%                  | 42,81%              | 42,86%           |
| Round 2  | 35,71%                          | 52,94%                       | 30,00%                   | 42,11%                        | 55,56%                       | 67,65%                        | 47,62%                            | 50,00%                          | 42,11%                       | 29,63%                  | 45,33%              | 46,40%           |

### Time to ambulation

|         | Australia<br>R1= 23<br>R2= 17 | Canada<br>R1= 19<br>R2= 7 |  | Finland<br>R1 = 13<br>R2 = 13 |  | Malaysia<br>R1= 10<br>R2= 6 | Netherlands<br>R1= 20<br>R2= 17 | Singapore<br>R1 = 32<br>R2 = 13 | Sweden<br>R1 = 10<br>R2 = 8 | USA<br>R1= 15<br>R2= 10 | Weighted<br>Average | Total<br>average |
|---------|-------------------------------|---------------------------|--|-------------------------------|--|-----------------------------|---------------------------------|---------------------------------|-----------------------------|-------------------------|---------------------|------------------|
| Parents |                               |                           |  |                               |  |                             |                                 |                                 |                             |                         |                     |                  |
| Round 1 | 31,82%                        | 50,00%                    |  | 15,38%                        |  | 58,33%                      | 68,42%                          | 46,67%                          | 30,77%                      | 66,67%                  | 46,01%              | 46,38%           |
| Round 2 | 29,41%                        | 71,43%                    |  | 23,08%                        |  | 66,67%                      | 41,18%                          | 46,15%                          | 12,50%                      | 50,00%                  | 42,55%              | 39,60%           |

|          | Australia<br>R1 = 18<br>R2 = 14 | Canada<br>R1 = 19<br>R2 = 17 | UK<br>R1 = 26<br>R2 = 20 | Finland<br>R1 = 19<br>R2 = 19 | France<br>R1 = 23<br>R2 = 18 | Malaysia<br>R1 = 34<br>R2= 34 | Netherlands<br>R1 = 24<br>R2 = 21 | Singapore<br>R1 = 32<br>R2 = 20 | Sweden<br>R1 = 19<br>R2 = 19 | USA<br>R1= 31<br>R2= 27 | Weighted<br>Average | Total<br>average |
|----------|---------------------------------|------------------------------|--------------------------|-------------------------------|------------------------------|-------------------------------|-----------------------------------|---------------------------------|------------------------------|-------------------------|---------------------|------------------|
| Surgeons |                                 |                              |                          |                               |                              |                               |                                   |                                 |                              |                         |                     |                  |
| Round 1  | 27,78%                          | 31,58%                       | 19,23%                   | 26,32%                        | 47,83%                       | 41,18%                        | 29,17%                            | 25,81%                          | 36,84%                       | 19,35%                  | 30,51%              | 30,33%           |
| Round 2  | 35,71%                          | 29,41%                       | 10,00%                   | 21,05%                        | 38,89%                       | 35,29%                        | 23,81%                            | 10,00%                          | 31,58%                       | 22,22%                  | 25,80%              | 25,80%           |

### Total cost

|         | Australia<br>R1= 23<br>R2= 17 | Canada<br>R1= 19<br>R2= 7 |  | Finland<br>R1 = 13<br>R2 = 13 |  | Malaysia<br>R1= 10<br>R2= 6 | Netherlands<br>R1= 20<br>R2= 17 | Singapore<br>R1 = 32<br>R2 = 13 | Sweden<br>R1 = 10<br>R2 = 8 | USA<br>R1= 15<br>R2= 10 | Weighted<br>Average | Total<br>average |
|---------|-------------------------------|---------------------------|--|-------------------------------|--|-----------------------------|---------------------------------|---------------------------------|-----------------------------|-------------------------|---------------------|------------------|
| Parents |                               |                           |  |                               |  |                             |                                 |                                 |                             |                         |                     |                  |
| Round 1 | 22,73%                        | 57,14%                    |  | 8,33%                         |  | 50,00%                      | 27,78%                          | 53,33%                          | 10,00%                      | 73,33%                  | 37,83%              | 39,85%           |
| Round 2 | 17,60%                        | 42,90%                    |  | 0,00%                         |  | 66,70%                      | 17,60%                          | 38,50%                          | 0,00%                       | 30,00%                  | 26,66%              | 23,30%           |

|          | Australia<br>R1 = 18<br>R2 = 14 | Canada<br>R1 = 19<br>R2 = 17 | UK<br>R1 = 26<br>R2 = 20 | Finland<br>R1 = 19<br>R2 = 19 | France<br>R1 = 23<br>R2 = 18 | Malaysia<br>R1 = 34<br>R2= 34 | Netherlands<br>R1 = 24<br>R2 = 21 | Singapore<br>R1 = 32<br>R2 = 20 | Sweden<br>R1 = 19<br>R2 = 19 | USA<br>R1= 31<br>R2= 27 | Weighted<br>Average | Total<br>average |
|----------|---------------------------------|------------------------------|--------------------------|-------------------------------|------------------------------|-------------------------------|-----------------------------------|---------------------------------|------------------------------|-------------------------|---------------------|------------------|
| Surgeons |                                 |                              |                          |                               |                              |                               |                                   |                                 |                              |                         |                     |                  |
| Round 1  | 27,78%                          | 78,95%                       | 19,23%                   | 36,84%                        | 30,43%                       | 35,29%                        | 58,33%                            | 38,71%                          | 26,32%                       | 74,19%                  | 42,61%              | 43,03%           |
| Round 2  | 35,71%                          | 70,59%                       | 5,00%                    | 36,84%                        | 22,22%                       | 24,24%                        | 57,14%                            | 40,00%                          | 26,32%                       | 62,96%                  | 38,10%              | 38,00%           |

### (Unplanned) CT scan

|         | Australia<br>R1= 23<br>R2= 17 | Canada<br>R1= 19<br>R2= 7 |  | Finland<br>R1 = 13<br>R2 = 13 |  | Malaysia<br>R1= 10<br>R2= 6 | Netherlands<br>R1= 20<br>R2= 17 | Singapore<br>R1 = 32<br>R2 = 13 | Sweden<br>R1 = 10<br>R2 = 8 | USA<br>R1= 15<br>R2= 10 | Weighted<br>Average | Total<br>average |
|---------|-------------------------------|---------------------------|--|-------------------------------|--|-----------------------------|---------------------------------|---------------------------------|-----------------------------|-------------------------|---------------------|------------------|
| Parents |                               |                           |  |                               |  |                             |                                 |                                 |                             |                         |                     |                  |
| Round 1 | 57,10%                        | 78,60%                    |  | 36,40%                        |  | 58,30%                      | 66,70%                          | 41,40%                          | 27,30%                      | 86,70%                  | 56,56%              | 56,30%           |
| Round 2 | 56,25%                        | 66,67%                    |  | 33,33%                        |  | 83,33%                      | 71,43%                          | 61,54%                          | 42,86%                      | 60,00%                  | 59,43%              | 58,30%           |

|          | Australia<br>R1 = 18<br>R2 = 14 | Canada<br>R1 = 19<br>R2 = 17 | UK<br>R1 = 26<br>R2 = 20 | Finland<br>R1 = 19<br>R2 = 19 | France<br>R1 = 23<br>R2 = 18 | Malaysia<br>R1 = 34<br>R2= 34 | Netherlands<br>R1 = 24<br>R2 = 21 | Singapore<br>R1 = 32<br>R2 = 20 | Sweden<br>R1 = 19<br>R2 = 19 | USA<br>R1= 31<br>R2= 27 | Weighted<br>Average | Total<br>average |
|----------|---------------------------------|------------------------------|--------------------------|-------------------------------|------------------------------|-------------------------------|-----------------------------------|---------------------------------|------------------------------|-------------------------|---------------------|------------------|
| Surgeons |                                 |                              |                          |                               |                              |                               |                                   |                                 |                              |                         |                     |                  |
| Round 1  | 72,22%                          | 57,89%                       | 57,69%                   | 57,89%                        | 40,91%                       | 30,30%                        | 45,83%                            | 26,67%                          | 52,63%                       | 58,06%                  | 50,01%              | 48,13%           |
| Round 2  | 64,29%                          | 58,82%                       | 65,00%                   | 52,63%                        | 44,44%                       | 34,38%                        | 57,14%                            | 31,58%                          | 47,37%                       | 55,56%                  | 51,12%              | 50,00%           |

**Wound infection**

|          | Australia<br>R1= 23<br>R2= 17   | Canada<br>R1= 19<br>R2= 7    |                          | Finland<br>R1 = 13<br>R2 = 13 |                              | Malaysia<br>R1= 10<br>R2= 6   | Netherlands<br>R1= 20<br>R2= 17   | Singapore<br>R1 = 32<br>R2 = 13 | Sweden<br>R1 = 10<br>R2 = 8  | USA<br>R1= 15<br>R2= 10 | Weighted<br>Average | Total<br>average |
|----------|---------------------------------|------------------------------|--------------------------|-------------------------------|------------------------------|-------------------------------|-----------------------------------|---------------------------------|------------------------------|-------------------------|---------------------|------------------|
| Parents  |                                 |                              |                          |                               |                              |                               |                                   |                                 |                              |                         |                     |                  |
| Round 1  | 68,18%                          | 60,00%                       |                          | 69,23%                        |                              | 54,55%                        | 86,67%                            | 62,50%                          | 69,23%                       | 83,33%                  | 69,21%              | 69,06%           |
| Round 2  | 70,59%                          | 85,71%                       |                          | 61,54%                        |                              | 100,00%                       | 94,12%                            | 92,31%                          | 75,00%                       | 80,00%                  | 82,41%              | 81,10%           |
|          | Australia<br>R1 = 18<br>R2 = 14 | Canada<br>R1 = 19<br>R2 = 17 | UK<br>R1 = 26<br>R2 = 20 | Finland<br>R1 = 19<br>R2 = 19 | France<br>R1 = 23<br>R2 = 18 | Malaysia<br>R1 = 34<br>R2= 34 | Netherlands<br>R1 = 24<br>R2 = 21 | Singapore<br>R1 = 32<br>R2 = 20 | Sweden<br>R1 = 19<br>R2 = 19 | USA<br>R1= 31<br>R2= 27 | Weighted<br>Average | Total<br>average |
| Surgeons |                                 |                              |                          |                               |                              |                               |                                   |                                 |                              |                         |                     |                  |
| Round 1  | 38,89%                          | 68,42%                       | 57,69%                   | 63,16%                        | 47,83%                       | 44,12%                        | 58,33%                            | 50,00%                          | 36,84%                       | 74,19%                  | 53,95%              | 54,29%           |
| Round 2  | 71,43%                          | 76,47%                       | 80,00%                   | 63,16%                        | 55,56%                       | 50,00%                        | 71,43%                            | 45,00%                          | 47,37%                       | 88,89%                  | 64,93%              | 64,60%           |
